# Supplementary material for: Manipulating electron redistribution between iridium and Co 6 Mo 6 C bridging with a carbon layer leads to a significantly enhanced overall water splitting performance at industrial-level current density
Source: Royal Society of Chemistry journal article supplement (doi:10.1039/d4sc02840f), 2024-01-01
Supplement: d4sc02840f1.pdf [file d4sc02840f1.pdf]

**Manipulating Electron Redistribution between Iridium and Co<sub>6</sub>Mo<sub>6</sub>C Bridging with Carbon Layer Leads to a Significantly Enhanced Overall Water Splitting Performance at Industrial-Level Current Density**

Weimo Li,<sup>‡a</sup> Wenqiong Gou,<sup>‡b</sup> Linfeng Zhang,<sup>a</sup> Mengxiao Zhong,<sup>a</sup> Siyu Ren,<sup>a</sup> Guangtao Yu,<sup>b</sup> Ce Wang,<sup>a</sup> Wei Chen,<sup>b\*</sup> Xiaofeng Lu<sup>a\*</sup>

<sup>a</sup>Alan G. MacDiarmid Institute, College of Chemistry, Jilin University, Changchun 130012, P.R. China. E-mail: xflu@jlu.edu.cn

<sup>b</sup>Engineering Research Center of Industrial Biocatalysis, Fujian Provincial Key Laboratory of Advanced Materials Oriented Chemical Engineering, Fujian-Taiwan Science and Technology Cooperation Base of Biomedical Materials and Tissue Engineering, College of Chemistry and Materials Science, Academy of Carbon Neutrality of Fujian Normal University, Fujian Normal University, Fuzhou 350007, China. E-mail: chenwei@fjnu.edu.cn

<sup>‡</sup>These authors contributed equally to this work.

<sup>†</sup>Electronic supplementary information (ESI) available.

Keywords: Ir nanoparticles, Co<sub>6</sub>Mo<sub>6</sub>C, nitrogen-doped Carbon, industrial-level current density, bifunctional electrocatalyst

## 1. Experimental section

### 1.1 Chemicals

Poly(vinylpyrrolidone) (PVP,  $M_w = 1,300,000 \text{ g mol}^{-1}$ ) was obtained from Alfa Aesar. Iridium oxide ( $\text{IrO}_2$ ), cobalt nitrate hexahydrate ( $\text{Co}(\text{NO}_3)_2 \cdot 6\text{H}_2\text{O}$ ), pyrrole ( $\text{C}_4\text{H}_5\text{N}$ ), bis(acetylacetonato)dioxomolybdenum(VI) ( $\text{C}_{10}\text{H}_{14}\text{MoO}_6$ ) and sodium dodecyl sulfate (SDS) were acquired from Aladdin Chemistry Co., Ltd. N, N-dimethylformamide (DMF) was purchased from Tianjin Tiantai Chemical Co., Ltd. Iridium chloride hydrate ( $\text{IrCl}_3 \cdot x\text{H}_2\text{O}$ ) and 5 wt% Nafion solution were available from Sigma-Aldrich. Commercial Pt/C (20 wt%) was procured from Johnson Matthey. Ethanol was brought from Sinopharm Chemical Reagent Co. Ltd. Sodium borohydride ( $\text{NaBH}_4$ ) was provided by Xilong Chemical Co., Ltd. Iron(III) chloride hexahydrate ( $\text{FeCl}_3 \cdot 6\text{H}_2\text{O}$ ) was received from Tianjin East China Reagent Factory. Ir black was purchased from Heraeus Holding.

### 1.2 Synthesis of $\text{CoMoO}_4$ nanofibers

Initially, a typical electrospinning technique was carried out to fabricate precursor nanofibrous membrane. Specifically, 0.2326 g of  $\text{Co}(\text{NO}_3)_2 \cdot 6\text{H}_2\text{O}$ , 0.2609 g of  $\text{C}_{10}\text{H}_{14}\text{MoO}_6$  and 0.5 g of PVP were dissolved in the mixture solution comprising 3 mL of DMF and 3 mL of ethanol under continuous stirring until it became a homogenous solution. The prepared electrospun precursor solution was then sealed into a syringe with the propulsion rate of  $0.02 \text{ mm min}^{-1}$  and the tip of its needle is 20 cm far away from the aluminum foil collector. Under the high voltage of 16 kV, precursor nanofibrous membrane was fabricated. Subsequently, a calcination procedure was performed and the above prepared membrane was conveyed into the muffle furnace under an air atmosphere at  $150 \text{ }^\circ\text{C}$  for 1 h with a heating speed of  $1 \text{ }^\circ\text{C min}^{-1}$ , followed by  $550 \text{ }^\circ\text{C}$  for 2 h with a heating speed of  $2 \text{ }^\circ\text{C min}^{-1}$ . The final product was  $\text{CoMoO}_4$  nanofibers ( $\text{CoMoO}_4$  NFs).

### 1.3 Synthesis of $\text{CoMoO}_4$ -PPy nanofibers

The formation of  $\text{CoMoO}_4$ -PPy nanofibers ( $\text{CoMoO}_4$ -PPy NFs) was accomplished via an in situ polymerization process. 5 mg of  $\text{CoMoO}_4$  NFs were dispersed into 15 mL

of water under vigorous stirring. Subsequently, 70  $\mu\text{L}$  of pyrrole and 1 mg of SDS were added into the above dispersion and stirred for 1 h. The solution was subjected to refrigeration for a modest duration of 5 min prior to the introduction of 10 mL of  $\text{FeCl}_3$  solution (7 mg  $\text{mL}^{-1}$ ) within the solution. Following a rigorous in situ polymerization procedure with a continuous stirring for 2 h, the resultant  $\text{CoMoO}_4$ -PPy NFs were thoroughly washed with water for several times and finally freeze-dried in vacuum overnight. Moreover,  $\text{CoMoO}_4$  NFs with varied contents of PPy was accomplished by adding diverse contents of pyrrole and  $\text{FeCl}_3$ . The  $\text{CoMoO}_4$ -50PPy NFs and  $\text{CoMoO}_4$ -90PPy NFs are synthesized by adding 50 and 90  $\mu\text{L}$  of pyrrole and 10 mL of  $\text{FeCl}_3$  (5 and 9 mg  $\text{mL}^{-1}$ ), respectively, alongside other procedure steps remaining unchanged.

#### **1.4 Synthesis of $\text{Co}_6\text{Mo}_6\text{C}$ -Ir nanofibers**

$\text{CoMoO}_4$ -PPy NFs were firstly put into a tubular furnace and subjected to a calcination process under an Ar atmosphere at 800  $^\circ\text{C}$  for 3 h with a heating speed of 2  $^\circ\text{C min}^{-1}$ . After that, the  $\text{Co}_6\text{Mo}_6\text{C}$  nanofibers ( $\text{Co}_6\text{Mo}_6\text{C}$  NFs) were obtained. In the following, 4 mg of  $\text{Co}_6\text{Mo}_6\text{C}$  NFs and a certain amount of  $\text{IrCl}_3$  solution (10 mg  $\text{mL}^{-1}$ ) were added into 10 mL of water with a vigorous shaking on the rotary shaker for 45 min, followed by the addition of 200  $\mu\text{L}$  of  $\text{NaBH}_4$  solution (10 mg  $\text{mL}^{-1}$ ). At last, the obtained  $\text{Co}_6\text{Mo}_6\text{C}$ -Ir NFs were rinsed with water for several times and freeze-dried in vacuum overnight. The volume additions of  $\text{IrCl}_3$  solution in the dispersion of  $\text{Co}_6\text{Mo}_6\text{C}$  NFs are 70, 100 and 130  $\mu\text{L}$  (denoted as  $\text{Co}_6\text{Mo}_6\text{C}$ -Ir-1 NFs,  $\text{Co}_6\text{Mo}_6\text{C}$ -Ir-2 NFs and  $\text{Co}_6\text{Mo}_6\text{C}$ -Ir-3 NFs, respectively). Moreover,  $\text{CoMoO}_4$ -50PPy NFs and  $\text{CoMoO}_4$ -90PPy NFs were also calcined at 800  $^\circ\text{C}$  for 3 h and then react with 100  $\mu\text{L}$  of  $\text{IrCl}_3$  (10 mg  $\text{mL}^{-1}$ ) in the presence of  $\text{NaBH}_4$ , which are denoted as  $\text{CoMoO}_4$ -50PPy-800 NFs,  $\text{CoMoO}_4$ -90PPy-800 NFs,  $\text{CoMoO}_4$ -50PPy-800-Ir-2 NFs and  $\text{CoMoO}_4$ -90PPy-800-Ir-2 NFs, respectively.

#### **1.5 Characterizations**

The morphology details pertaining to the as-synthesized catalysts were characterized by field-emission scanning emission microscopy (FESEM, FEI Nova NanoSEM) and transmission electron microscopy (TEM, JEOL JEM-2100), respectively. The associated elemental composition distributions and crystalline

structures were confirmed via the high-angle annular dark-field scanning transmission electron microscopy (HAADF-STEM) image, elemental mapping analysis, energy-dispersive X-ray (EDX) patterns and high-resolution TEM (HRTEM) images, which were accomplished by FEI Tecnai G2 F20. An inductively coupled plasma (ICP, Agilent 725) was employed to quantify each element content in the synthesized catalysts. X-ray diffraction (XRD, PANalytical B.V. Empyrean with Cu K $\alpha$  radiation), Raman profiling (LabRAM HR Evolution) and X-ray photoelectron spectroscopy (XPS, Thermo Fisher Scientific ESCALAB 250) were employed to further probe the valence states and atomic arrangement of the as-synthesized catalysts.

### 1.6 Electrochemical measurements

All the electrochemical measurements were executed on the CHI660E electrochemical workstation under alkaline environment at ambient temperature. The evaluations of HER and OER performance tests were accomplished through a three-electrode configuration in 1 M KOH solution. During the electrochemical tests, catalyst-loaded carbon paper (CP), Hg/HgO electrode as along with Pt wire (for OER test) or graphite rod (for HER test) are utilized as the working electrode, reference electrode and counter electrode, respectively. In the preparation procedure of working electrode, 4 mg of catalyst is blended with 990  $\mu$ L of water, 990  $\mu$ L of ethanol and 20  $\mu$ L of 5 wt% Nafion solution and then conducts a continuous ultrasonication. Next, 50  $\mu$ L of the prepared catalyst ink is dropped on the surface of CP (0.09 cm<sup>2</sup>) to achieve the modified working electrode. Furthermore, to obtain precise electrochemical data, the calibration of Hg/HgO electrode toward reversible hydrogen electrode (RHE) in alkaline environment is also conducted (Fig. S48).

Prior to the acquisition of electrochemical data, several cyclic voltammetry (CV) cycles were executed in an Ar-saturated 1 M KOH solution to attain a steady state throughout the system. During the electrochemical tests, for the precise electrochemical data, linear scan voltammetry (LSV) was implemented with a scan rate of 1 mV s<sup>-1</sup>. Electrochemical impedance spectroscopy (EIS) was executed at a frequency domain of 0.1-10<sup>5</sup> Hz and executed at -1.2 and 0.68 V vs. Hg/HgO electrode for HER and OER process, respectively. The double-layer capacitance ( $C_{dl}$ ) was acquired via CV

measurements with various scan rates (10, 20, 30, 40, 50, 60, 70, 80, 90, 100 mV s<sup>-1</sup>) within the potential domains of -0.3 to -0.2 V vs. Hg/HgO electrode. The electrochemical active surface area (ECSA) is also calculated, which is linearly proportional to the C<sub>dl</sub>. The corresponding formula is illustrated below:

$$\text{ECSA} = C_{dl}/C_s$$

Roughness factor (RF) is also calculated below:

$$\text{RF} = \text{ECSA}/S$$

The mass activity with regard to noble metal (MA<sub>NM</sub>) is calculated below:

$$\text{Mass activity (MA)} = j \times S/m_{\text{NM}}$$

Turnover frequency (TOF) values is calculated below:

$$\text{TOF} = j \times S/(z \times F \times n_{\text{metal}})$$

where C<sub>s</sub> denotes the specific capacitance for a 1 cm<sup>2</sup> flat surface, which is predominantly recognized as 0.04 mF cm<sup>-2</sup> in alkaline solution; S signifies the surface area covered by catalysts; j depicts the current density; m<sub>NM</sub> signifies the mass of noble metal; z refers to the accepted or donated electrons for the generation of each H<sub>2</sub> or O<sub>2</sub> molecule (2 for HER process and 4 for OER process); F signifies the Faraday constant (96485.3 C mol<sup>-1</sup>); n<sub>metal</sub> denotes the quantity of moles of all the active metal (the lowest TOF values are calculated). All aforementioned electrochemical data were collected with iR compensation.

A two-electrode system was employed to assess the OWS performance of the assembled alkaline electrolyzers. The LSV curves were performed at 1 mV s<sup>-1</sup>. The Faraday efficiencies (FEs) of the electrolyzers were measured by collecting gas through drainage method at the current density of 200 mA cm<sup>-2</sup>.

The FE is calculated as follows:

$$\text{FE} = [z \times F \times n_{\text{gas}}/(I \times t)] \times 100\%$$

$$n_{\text{gas}} = V_{\text{gas}}/V_m$$

z denotes the captured or donated electrons for the generation of each H<sub>2</sub> or O<sub>2</sub> molecule (2 for HER process and 4 for OER process); F signifies the Faraday constant (96485.3 C mol<sup>-1</sup>); n<sub>gas</sub> represents the quantity of moles of gas evolved; I symbolizes the constant current applied for t min; V<sub>m</sub> denotes molar volume of gas (24.5 L mol<sup>-1</sup> at room

temperature). All the OWS electrochemical examinations were conducted with the CP as the substrate, except for the durability test (nickel foam was chosen as the substrate).

## 2. Theoretical section

### 2.1 Computational methods

Under the density functional theory (DFT), all computations are performed within the rigorous framework of the Vienna *ab initio* simulation package (VASP) [1]. The exploitation of exchange correlation energy is informed by the generalized gradient approximation (GGA) fortified with the Perdew-Burke-Enzzerhof (PBE) formulation [2], wherein the semi-empirical van der Waals (vdW) methodology (DFT-D2) devised by Grimme is incorporated to encompass the dispersion interaction [3,4]. The utilization of projector-augmented plane wave (PAW) serves to simulate the electron-ion interactions [5], and a 450-eV energy cutoff is applied for the plane-wave basis set. Three different configurations of  $3\times 3\times 3$ ,  $3\times 3\times 1$  and  $2\times 3\times 1$  Monkhorst-Pack grid k-points are employed respectively for the geometric optimization of the bulk structure and the corresponding slab model of  $\text{Co}_6\text{Mo}_6\text{C}$ , as well as the intricate assembly composed of the ultra-thin carbon layer overlying the  $\text{Co}_6\text{Mo}_6\text{C}$ . The convergence threshold is set as  $10^{-4}$  eV in energy. For all simulations of the slab models, the symmetrization was switched off and the dipolar correction was included.

### 2.2 Theoretical models

The bulk  $\text{Co}_6\text{Mo}_6\text{C}$  possesses a cubic structure and is classified into the space group  $Fd\bar{3}m$  (Fig. S33a online). The optimized lattice parameter  $a$  is approximately 10.772 Å, which conforms nicely to the corresponding experimental value (10.897 Å). By disassembling the optimized bulk  $\text{Co}_6\text{Mo}_6\text{C}$  framework through the low-index (100) plane, we obtained two different surfaces terminated by Co- and MoC-layers, as shown in Figs. S33b and S33c (online). Each configuration can be simulated with the corresponding slab model comprising five stoichiometric  $\text{Co}_6\text{Mo}_6\text{C}$  layers. Within the theoretical models, the upper two layers are relaxed devoid of any symmetry or direction restrictions, while the underlying layers remain fixed throughout the

computational process. Based on the aforementioned models, the corresponding surface energies ( $\gamma$ ) are estimated by the equation below, which was used to quantify the excess energy of the surface with respect to the bulk [6].

$$\gamma = \frac{E_{slab} - nE_{bulk}}{A} - \frac{E_{slab}^{unrelax} - nE_{bulk}}{2A}$$

where  $E_{slab}$  is the total energy of the slab (relaxed on one side),  $E_{unrelax}$  is the total energy of the unrelaxed slab,  $n$  is the number of  $\text{Co}_6\text{Mo}_6\text{C}$  units in the slab structure. Moreover,  $E_{bulk}$  is the energy of a  $\text{Co}_6\text{Mo}_6\text{C}$  formula unit in bulk structure, and  $A$  is the surface area of one side of the slab. Our results verify that the calculated surface energies are 0.220 and 0.231 J/m<sup>2</sup> for the Co-terminated and MoC-terminated slabs, respectively, implying that the configuration of Co-termination is more stable in terms of energy. It will be selected as the structural unit for constructing the theoretical model of subsequent composite system.

Specifically, based on the relevant experimental data, we formulated the corresponding theoretical model of  $\text{Co}_6\text{Mo}_6\text{C}$ -Ir NFs system by enveloping the N-doped graphene on the Co-terminated  $\text{Co}_6\text{Mo}_6\text{C}$  slab, to simulate the ultra-thin N-doped carbon layer enveloping the  $\text{Co}_6\text{Mo}_6\text{C}$  system. The lattice mismatch between them is noted to be almost negligible (within 4%). Within this theoretical model, two distinct types of nitrogen atoms (*i.e.*, pyridine nitrogen and graphitic nitrogen) are introduced into the N-doped graphene, considering the circumstance that they can be predominantly observed in our experiment. Subsequently, the  $\text{Ir}_4$  structure representing the Ir metal cluster is deposited on the surface of N-doped graphene covering  $\text{Co}_6\text{Mo}_6\text{C}$  system. Our computational findings disclose that the  $\text{Ir}_4$  cluster can be stably anchored on the material surface, and the three representative Ir atoms at the bottom are connected by carbon, pyridine nitrogen or carbon atoms adjacent to graphitic nitrogen, respectively. Throughout the computations, the bottom layer comprising stoichiometric  $\text{Co}_6\text{Mo}_6\text{C}$  units is frozen, while the rest are completely relaxed.

### 2.3 The free-energy calculations on hydrogen evolution reaction (HER)

The HER catalytic activity can be assessed by determining the adsorption free

energy of H\* ( $\Delta G_{H^*}$ ). The  $\Delta G_{H^*}$  value can be calculated via the equation  $\Delta G_{H^*} = \Delta E_{H^*} + \Delta E_{ZPE} - T\Delta S$ , where  $\Delta E_{H^*}$ ,  $\Delta E_{ZPE}$  and  $\Delta S$  represent the binding energy, zero point energy change and entropy change of H\* adsorption, respectively. Among them,  $\Delta E_{H^*}$  can be obtained through the formula  $\Delta E_{H^*} = E_{\text{slab-H}} - E_{\text{slab}} - 1/2 E_{H_2}$ , wherein  $E_{H_2}$  denotes the total energy of an individual H<sub>2</sub> molecule, and  $E_{\text{slab-H}}/E_{\text{slab}}$  is the total energy of the slab model with/without H\*. Furthermore, due to the negligible vibrational entropy of H\*, we can compute  $\Delta S$  via the relationship  $\Delta S = S_{H^*} - 1/2 S_{H_2} \approx -1/2 S_{H_2}$ . Hence, the  $T\Delta S$  value can be -0.205 eV, given that  $T S_{H_2}$  is 0.41 eV for H<sub>2</sub> at 300 K and 1.0 atm. Additionally, we can ascertain  $\Delta E_{ZPE}$  for H\* through the formula  $\Delta E_{ZPE} = E_{ZPE}(H^*) - 1/2 E_{ZPE}(H_2)$ . Our calculated  $\Delta E_{ZPE}(H_2)$  value is approximately 0.305 eV, which aligns closely with the reported result by Norskov *et al* [7].

#### 2.4 The free-energy calculations on oxygen evolution reaction (OER)

The OER reaction is one of the half reactions in water splitting process, which usually consists of four fundamental reaction steps, as shown in the following formulas (1)-(4):

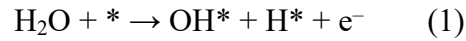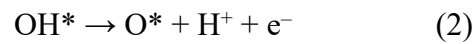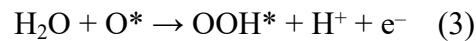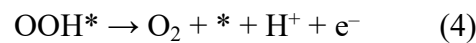

where \* means an active site on the catalyst surface, and OH\*, O\* or OOH\* represent three different intermediates.

In accordance with the structural model of composite system, the computational hydrogen electrode (CHE) model proposed by Nørskov *et al.* is utilized to assess the reaction Gibbs free energy change ( $\Delta G$ ) [8,9], and the  $\Delta G$  value for each step of OER is defined as:

$$\Delta G = \Delta E + \Delta E_{ZPE} - T\Delta S + \Delta G_U + \Delta G_{pH}$$

where  $\Delta E$ ,  $\Delta E_{ZPE}$  and  $\Delta S$  signify the change of total energy, the change of zero-point energy and entropy prior and subsequent to the reaction, respectively, and  $T$  signifies the reaction temperature. The influence of the applied external electrode potential (U)



is  $\Delta G_U = -neU$ , where  $n$  signifies the number of electrons transferred during the reaction.  $\Delta G_{pH} = -k_B T \ln 10 \times pH$  contributes a correction for free energy reliant on the concentration of  $H^+$  ions, wherein  $k_B$  denotes the Boltzmann constant, and  $pH$  is considered as zero for an acidic medium. Regarding the steps involving proton-electron pair transfer, the free energy  $G(H^+ + e^-)$  is approximately equal to  $1/2G(H_2)$ . The Gibbs free energy value for oxygen is attained from the equation  $G_{O_2} = 2G_{H_2O} - 2G_{H_2} + 4.92$  eV [10]. The overpotential ( $\eta$ ) value of OER can be estimated by using the following formula:

$$\eta = \max \{ \Delta G_a, \Delta G_b, \Delta G_c, \Delta G_d \} / e - 1.23 \text{ V}$$

As is well established,  $\eta$  is frequently employed to assess the catalytic activity of oxygen evolution catalysts. The smaller  $\eta$ , the higher the OER catalytic activity. In the case where  $pH = 0$ , based on the Nernst equation, the equilibrium electrode potential is 1.23 V.

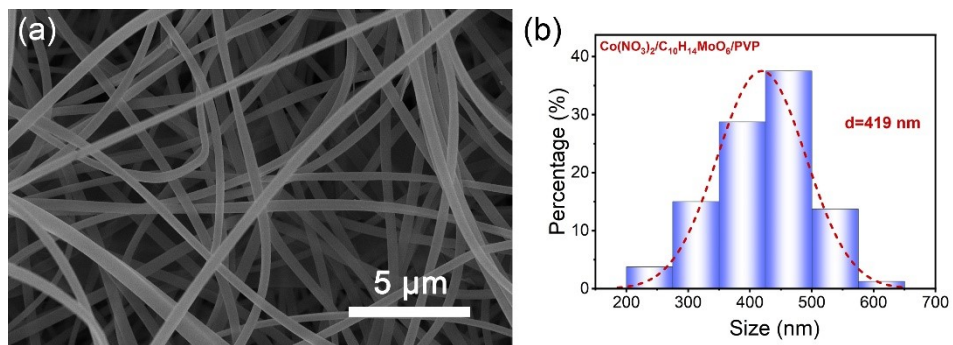

**Figure S1.** (a) SEM image and (b) diameter distribution of precursor nanofibers.

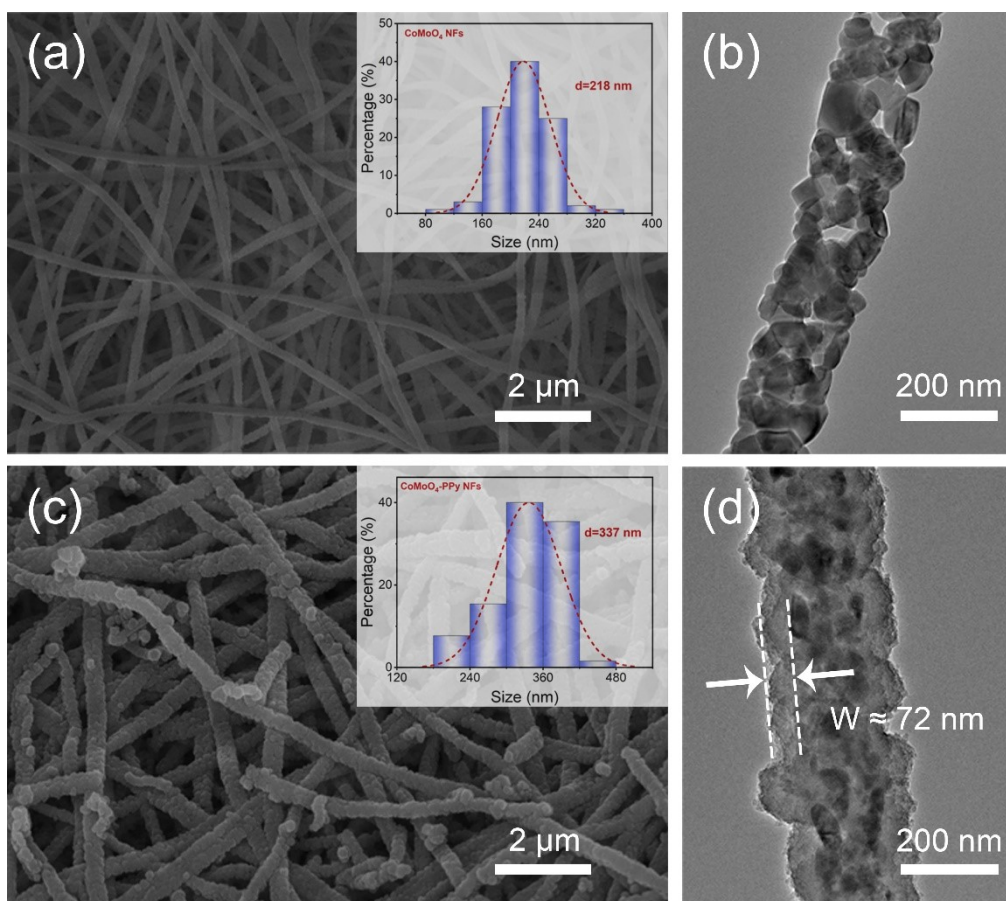

**Figure S2.** (a, c) SEM and (b, d) TEM images of (a, b) CoMoO<sub>4</sub> NFs and (c, d) CoMoO<sub>4</sub>-PPy NFs. Insets of (a, c): Diameter distributions of CoMoO<sub>4</sub> NFs and CoMoO<sub>4</sub>-PPy NFs.

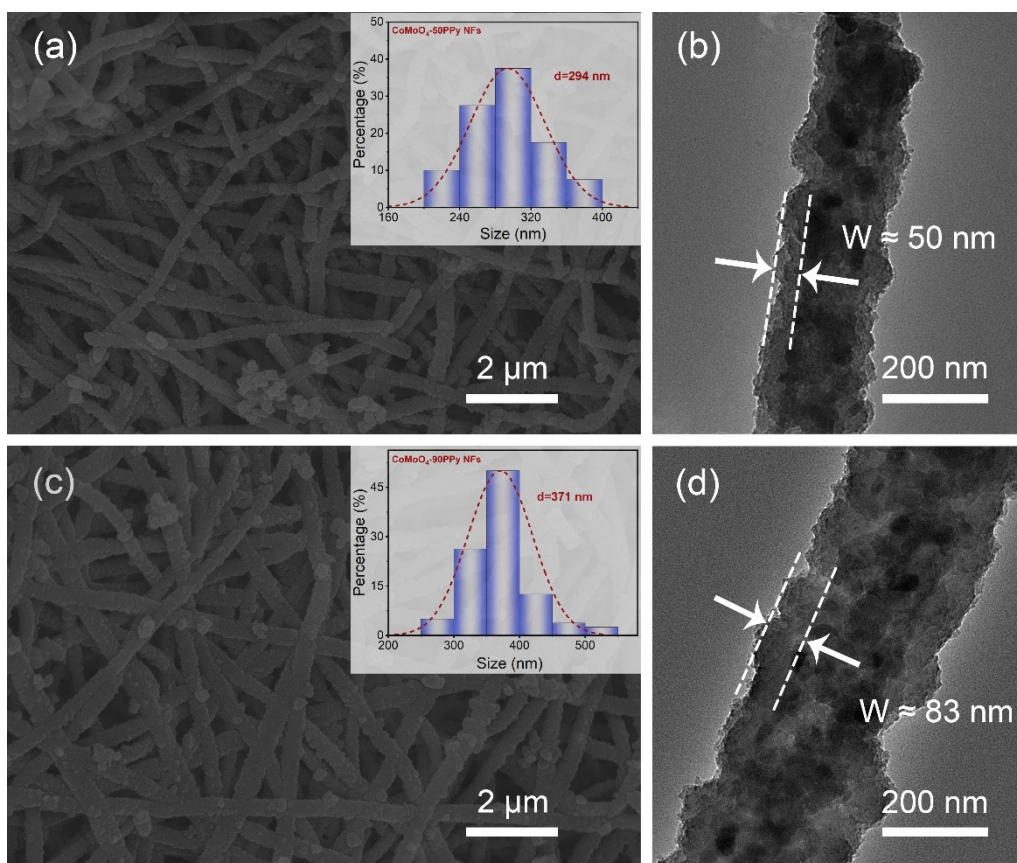

**Figure S3.** (a, c) SEM and (b, d) TEM images of (a, b) CoMoO<sub>4</sub>-50PPy NFs and (c, d) CoMoO<sub>4</sub>-90PPy NFs. Insets of (a, c): Diameter distributions of CoMoO<sub>4</sub>-50PPy NFs and CoMoO<sub>4</sub>-90PPy NFs.

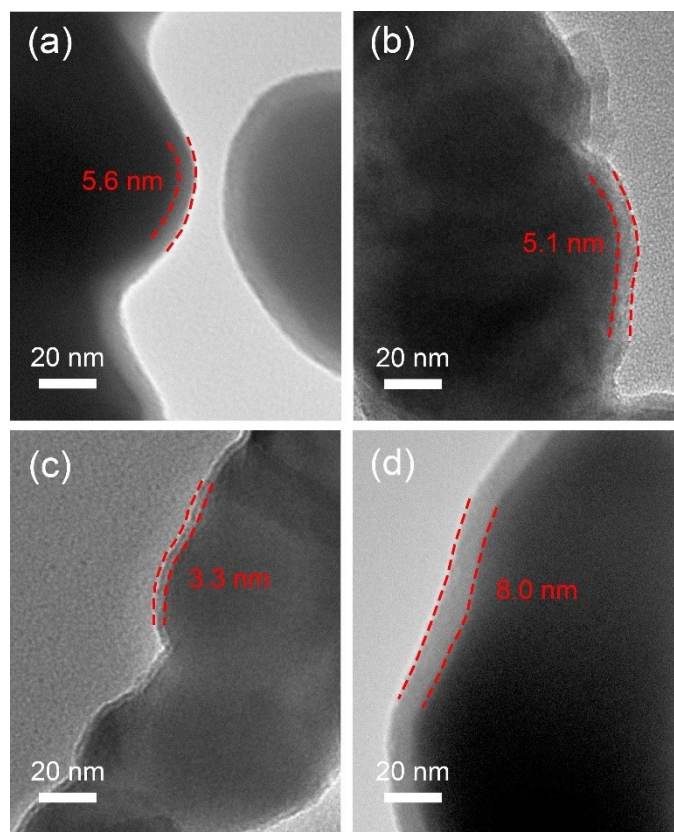

**Figure S4.** (a-d) TEM images to show the thickness of carbon layer of  $\text{Co}_6\text{Mo}_6\text{C-Ir-2}$  NFs for different preparation batches.

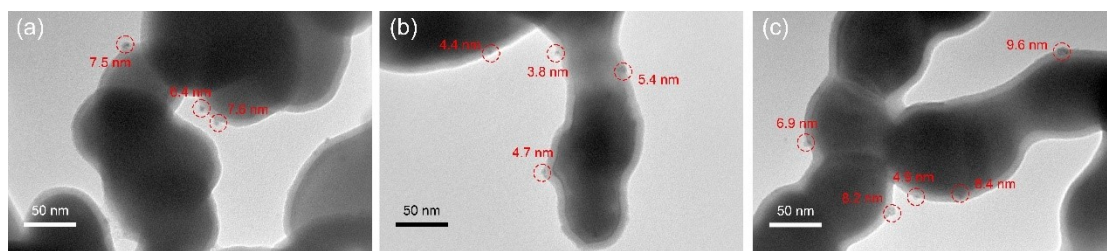

**Figure S5.** (a-c) The enlarge TEM images of  $\text{Co}_6\text{Mo}_6\text{C-Ir-2}$  NFs.

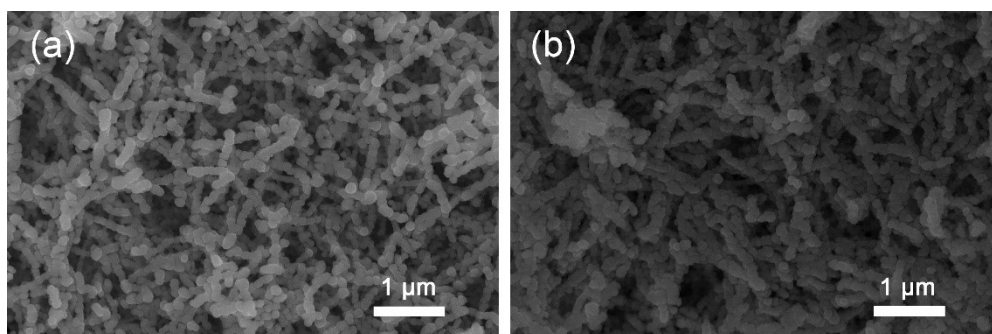

**Figure S6.** SEM images of (a) Co<sub>6</sub>Mo<sub>6</sub>C-Ir-1 NFs and (b) Co<sub>6</sub>Mo<sub>6</sub>C-Ir-3 NFs.

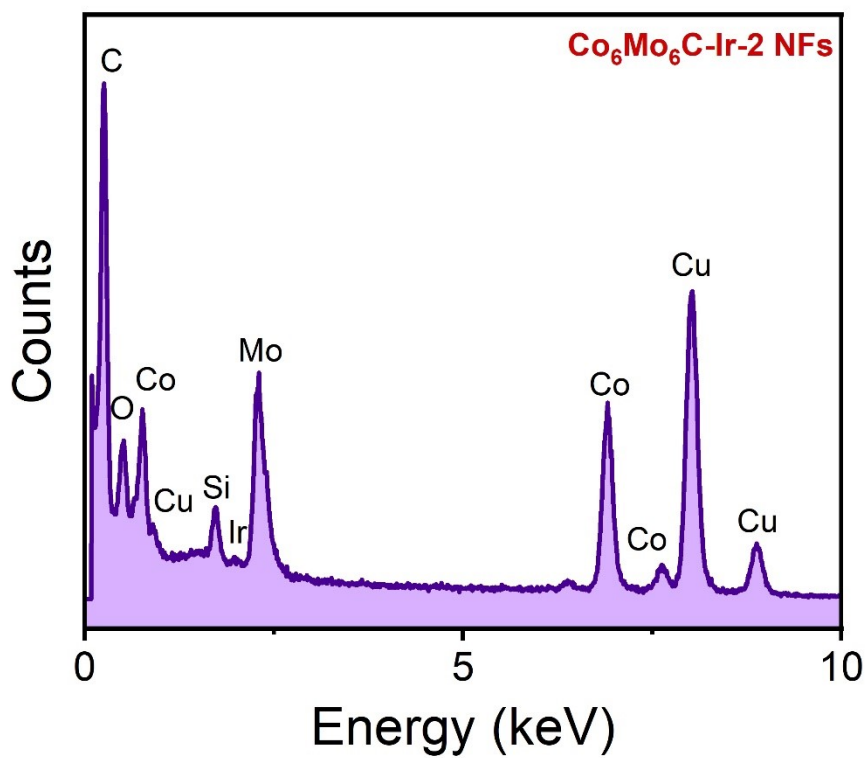

**Figure S7.** EDX spectrum of  $\text{Co}_6\text{Mo}_6\text{C-Ir-2 NFs}$ .



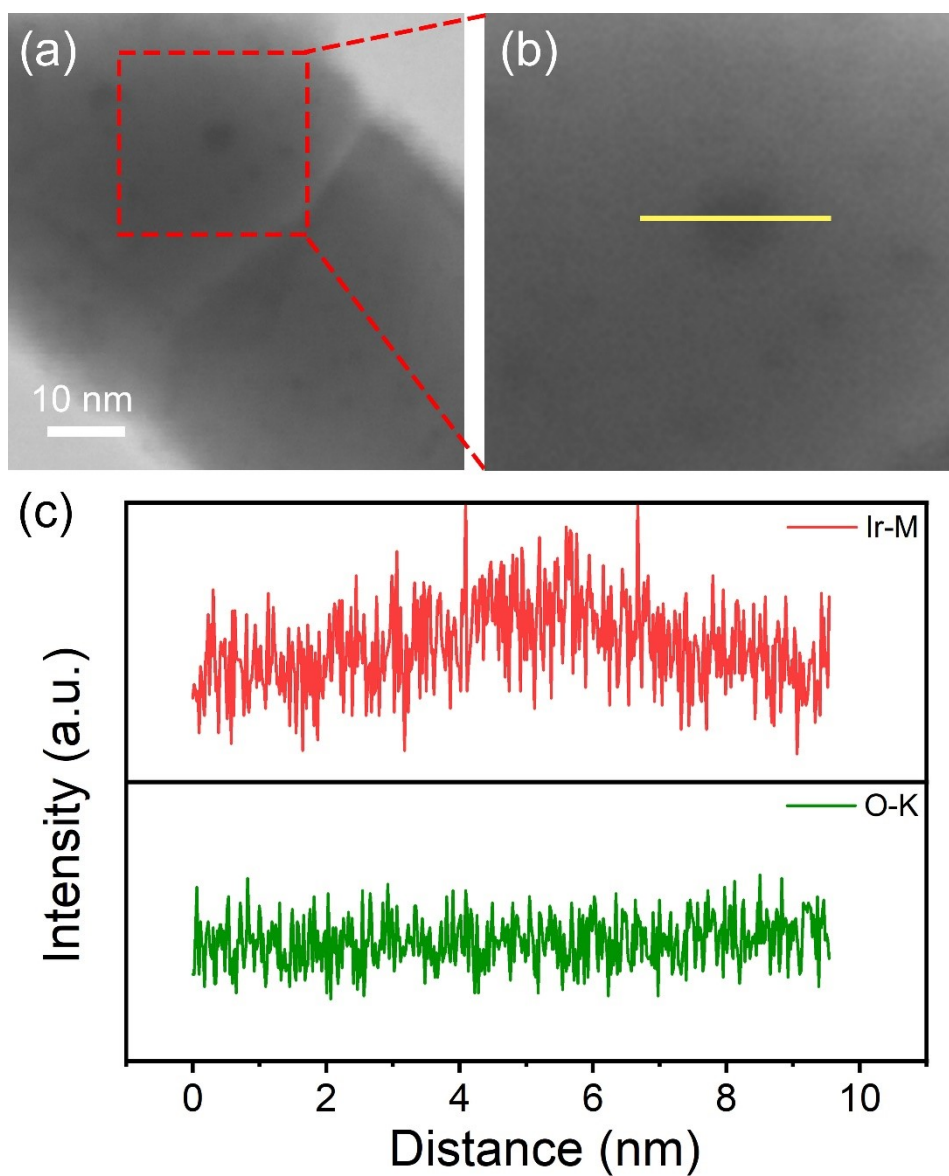

**Figure S8.** (a) STEM image, (b) enlarged STEM image and (c) HADDF/STEM line scans of  $\text{Co}_6\text{Mo}_6\text{C-Ir-2}$  NFs.

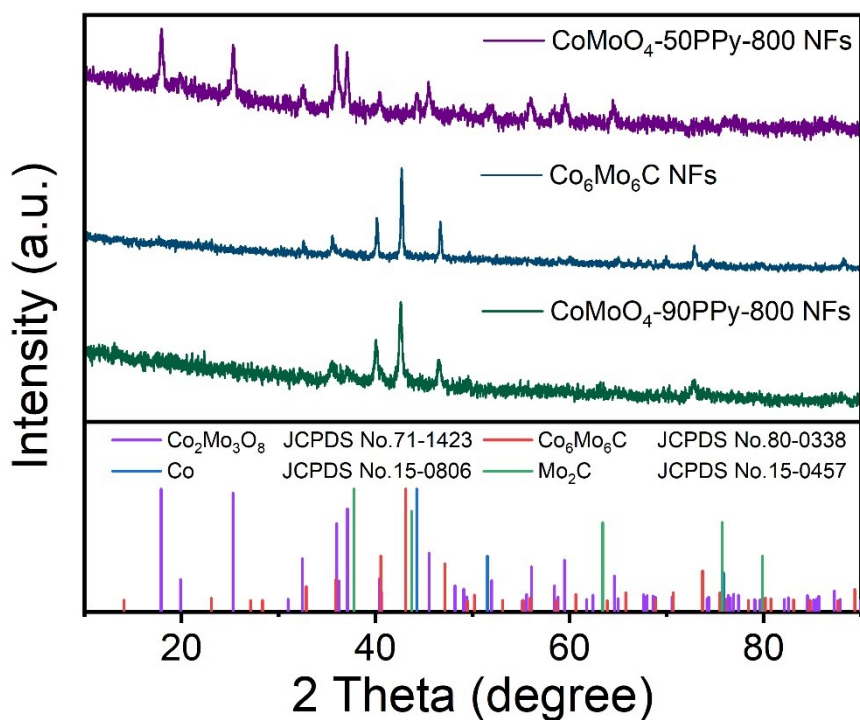

**Figure S9.** XRD patterns of CoMoO<sub>4</sub>-50PPy-800 NFs, Co<sub>6</sub>Mo<sub>6</sub>C NFs and CoMoO<sub>4</sub>-90PPy-800 NFs.

**Note:** The CoMoO<sub>4</sub>-50PPy-800 NFs show the diffraction peaks that correspond to Co<sub>2</sub>Mo<sub>3</sub>O<sub>8</sub> (JCPDS No. 71-1423) and Co (JCPDS No. 15-0806), while the diffraction peaks of CoMoO<sub>4</sub>-90PPy-800 NFs are ascribed to Co<sub>6</sub>Mo<sub>6</sub>C (JCPDS No. 80-0338) and Mo<sub>2</sub>C (JCPDS No. 15-0457).

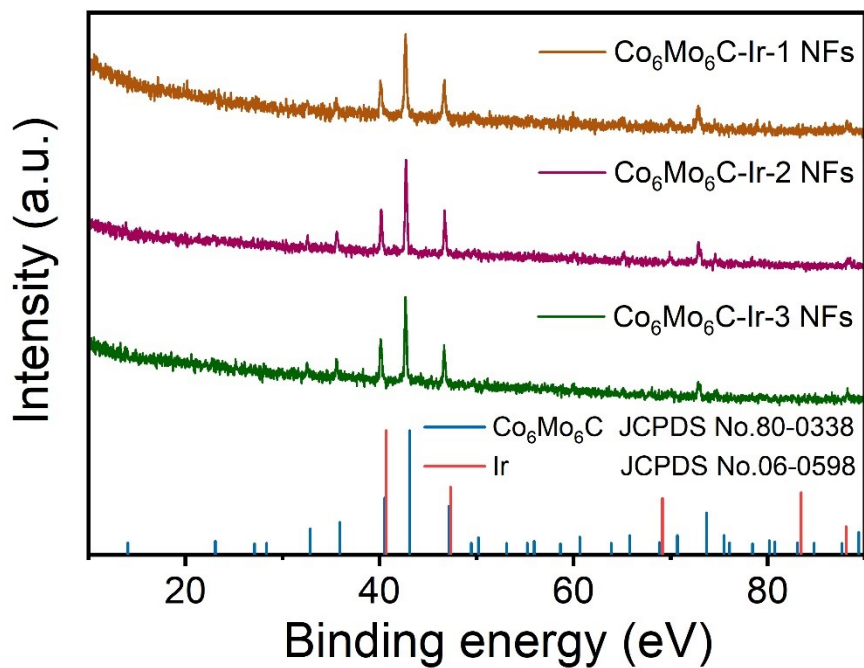

**Figure S10.** XRD patterns of  $\text{Co}_6\text{Mo}_6\text{C-Ir-1}$  NFs,  $\text{Co}_6\text{Mo}_6\text{C-Ir-2}$  NFs and  $\text{Co}_6\text{Mo}_6\text{C-Ir-3}$  NFs.

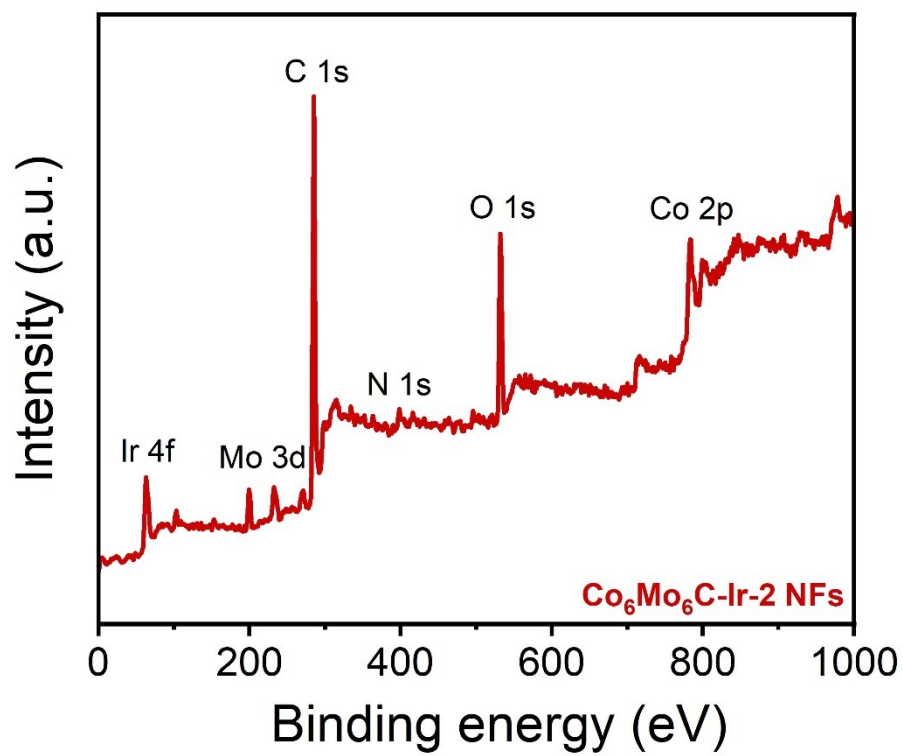

**Figure S11.** The XPS survey spectrum of Co<sub>6</sub>Mo<sub>6</sub>C-Ir-2 NFs.

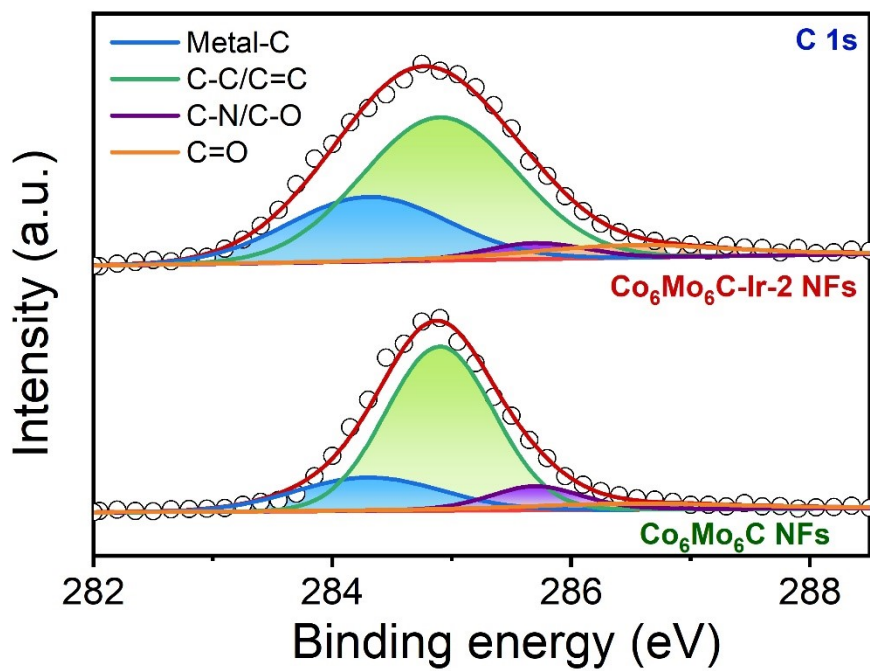

**Figure S12.** Typical high-resolution C 1s XPS spectra of  $\text{Co}_6\text{Mo}_6\text{C NFs}$  and  $\text{Co}_6\text{Mo}_6\text{C-Ir-2 NFs}$ .

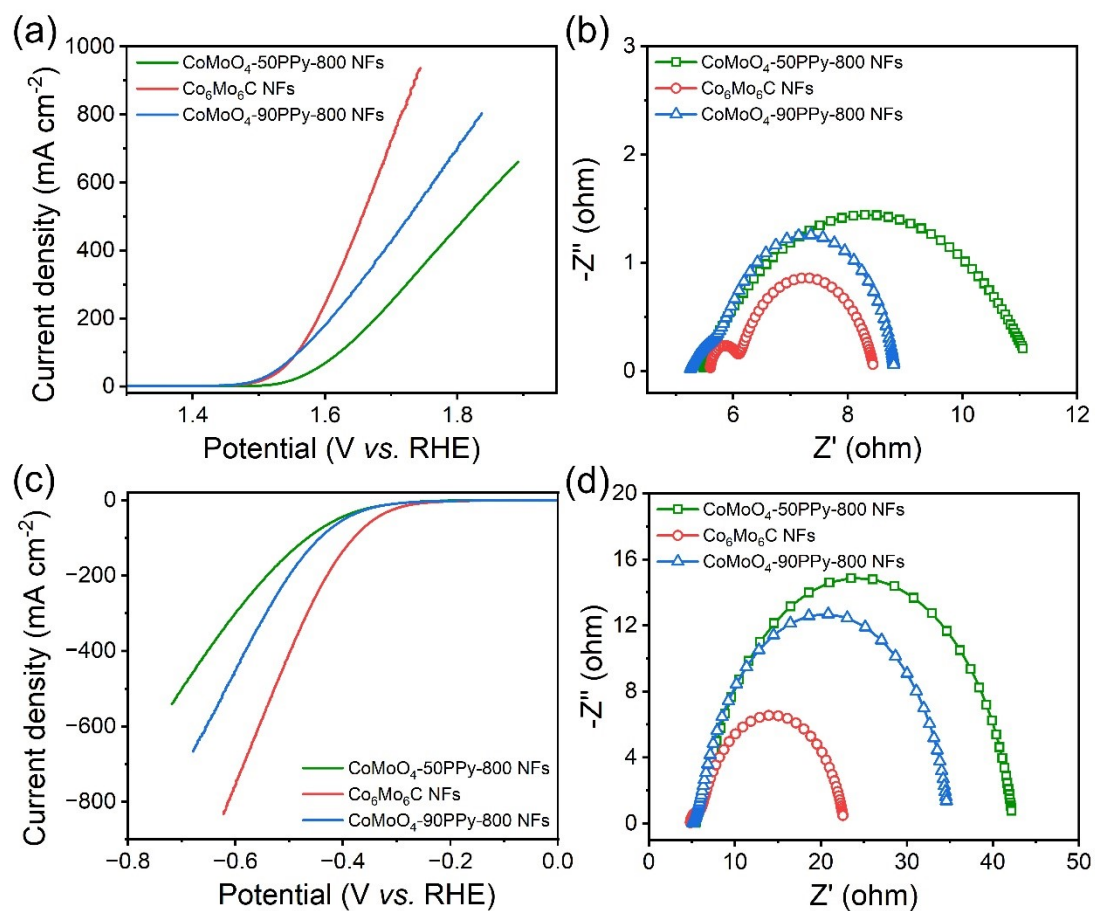

**Figure S13.** (a, c) LSV curves and (b, d) Nyquist plots of Co<sub>6</sub>Mo<sub>6</sub>C NFs and other catalysts for OER and HER.

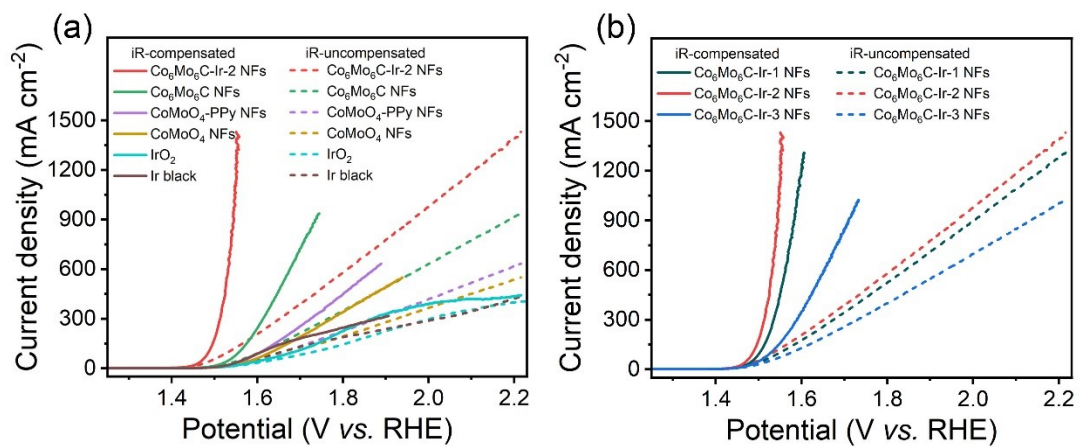

**Figure S14.** (a, b) The LSV curves of varied catalysts with and without iR compensation for OER.

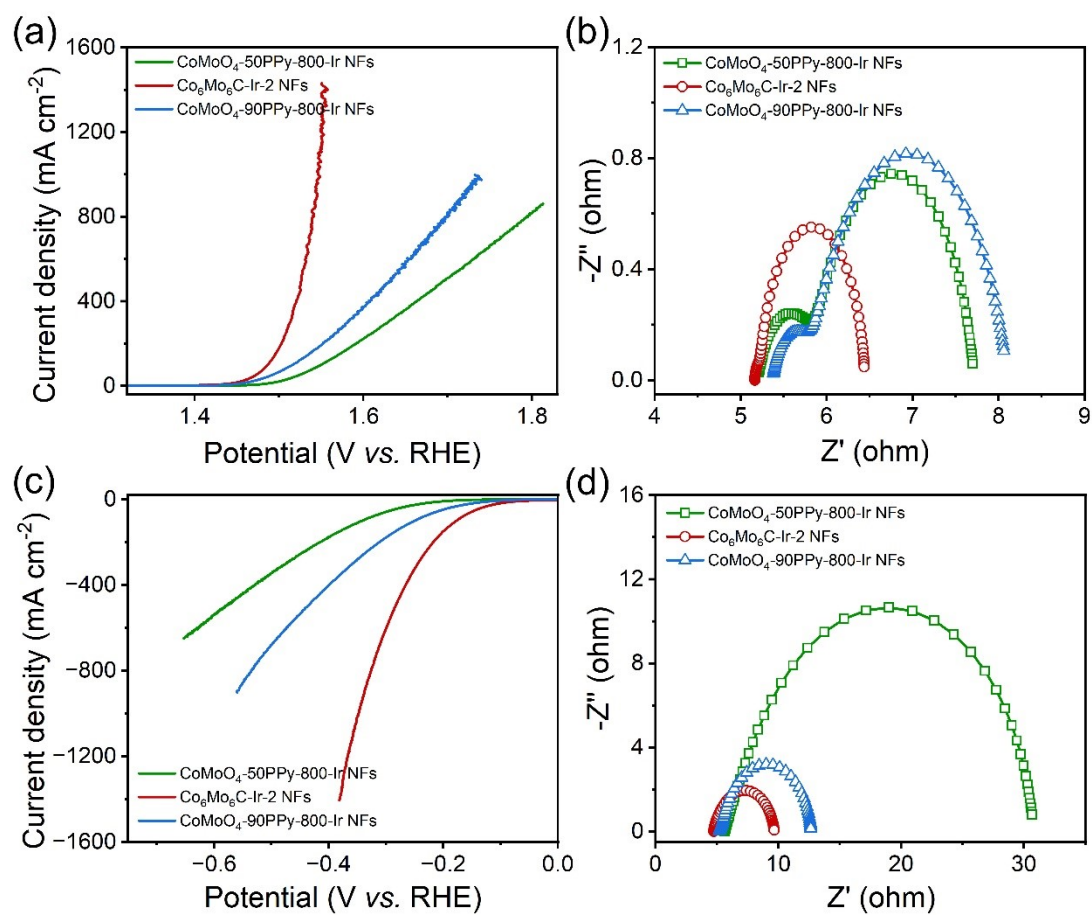

**Figure S15.** (a, c) LSV curves and (b, d) Nyquist plots of Co<sub>6</sub>Mo<sub>6</sub>C-Ir-2 NFs and other catalysts for OER and HER.



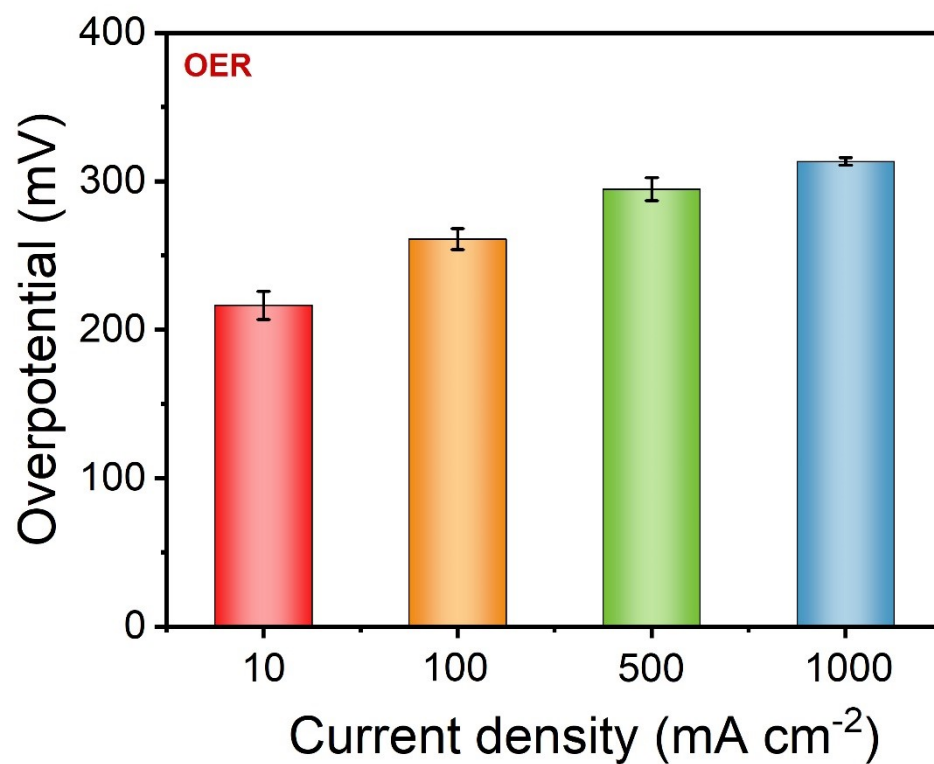

**Figure S16.** The evaluation of the OER overpotentials of Co<sub>6</sub>Mo<sub>6</sub>C-Ir NFs at 10, 100, 500 and 1000 mA cm<sup>-2</sup>. Error bars represent the standard deviations of three independent measurements under the same conditions.

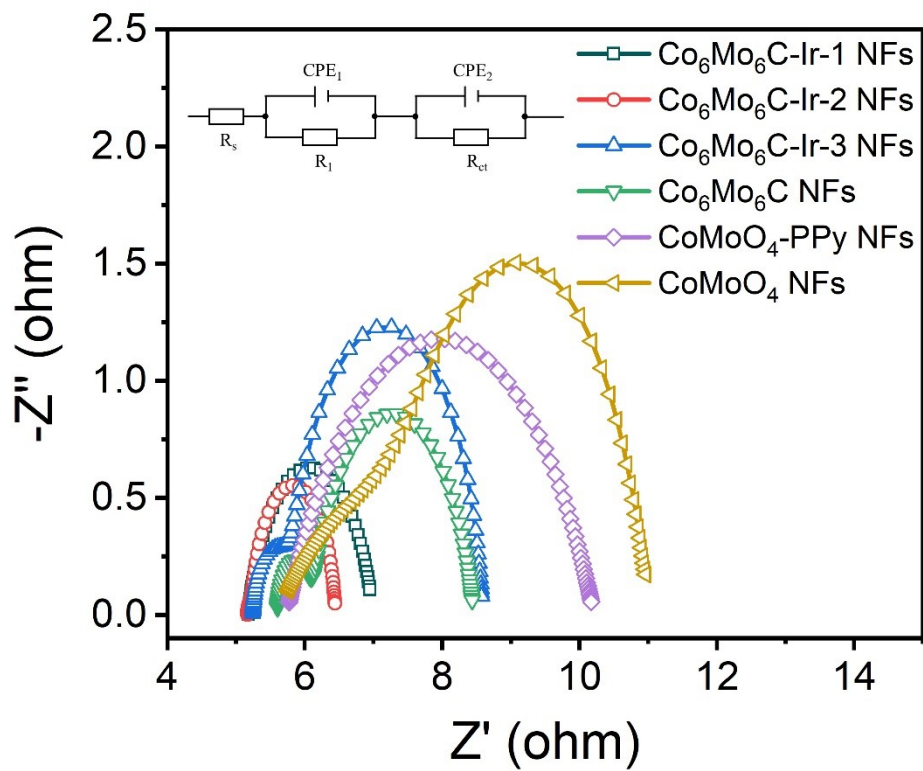

**Figure S17.** Nyquist plots of  $Co_6Mo_6C-Ir-2$  NFs and other catalysts that performed at 0.68 V vs. Hg/HgO electrode.

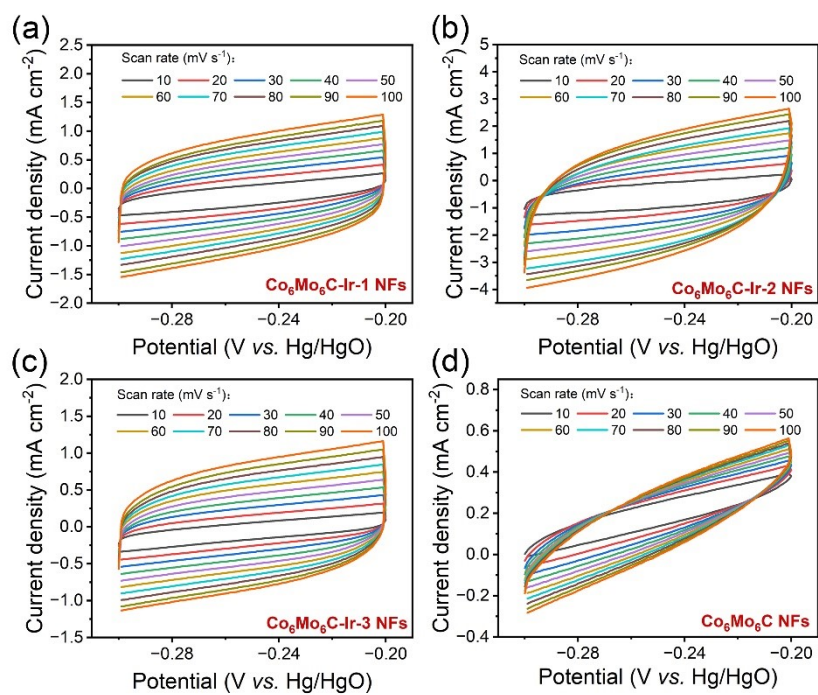

**Figure S18.** The CV curves of (a)  $\text{Co}_6\text{Mo}_6\text{C-Ir-1}$  NFs, (b)  $\text{Co}_6\text{Mo}_6\text{C-Ir-2}$  NFs, (c)  $\text{Co}_6\text{Mo}_6\text{C-Ir-3}$  NFs and (d)  $\text{Co}_6\text{Mo}_6\text{C}$  NFs with different scan rates from 10 to 100  $\text{mV s}^{-1}$ .

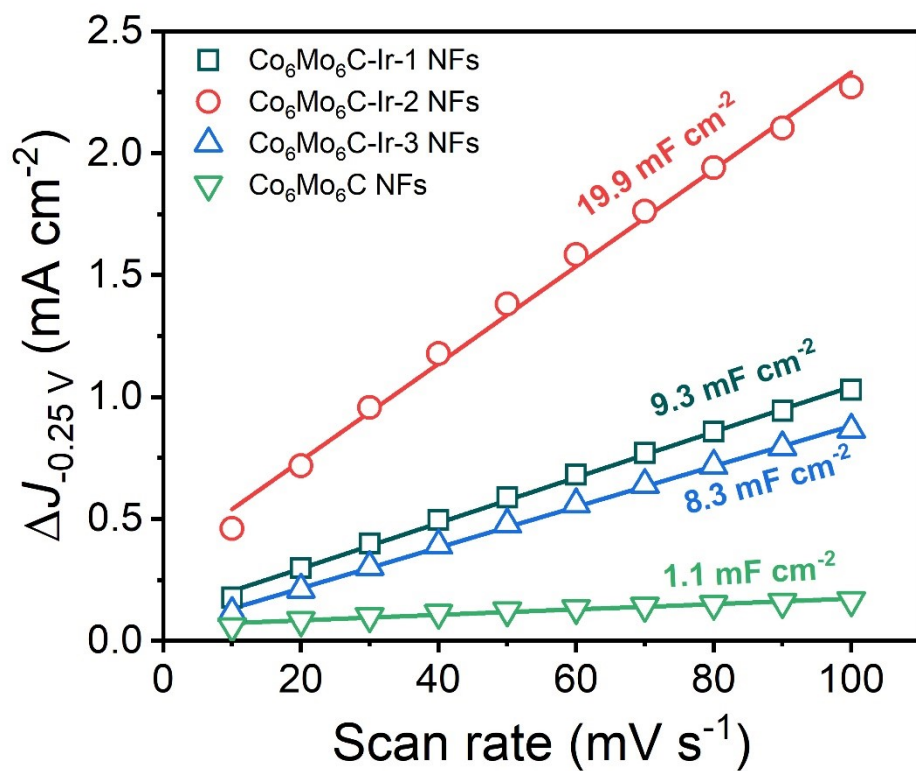

**Figure S19.**  $C_{dl}$  values obtained from the linear fitting of capacitance currents and scan rates.

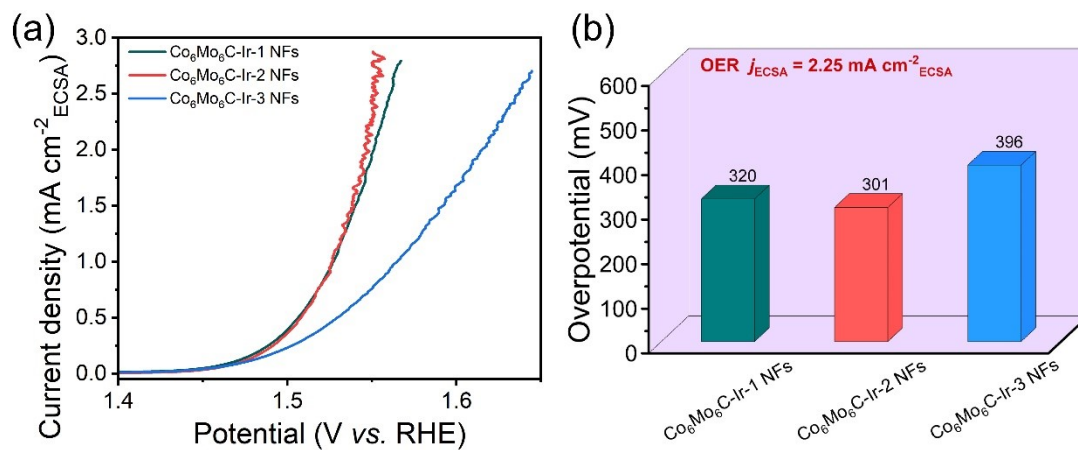

**Figure S20.** (a) OER polarization curves normalized to ECSA in 1 M KOH. (b) The corresponding specific activities at the current density of 2.25 mA cm<sup>-2</sup><sub>ECSA</sub>.

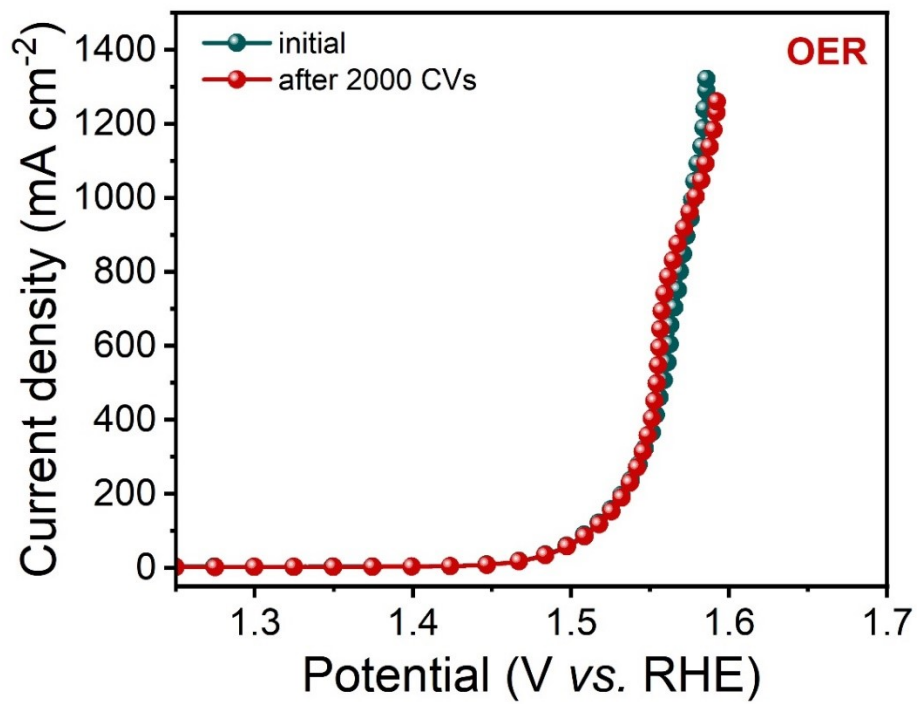

**Figure S21.** The LSV curves of Co<sub>6</sub>Mo<sub>6</sub>C-Ir-2 NFs for OER before and after 2000 CVs.

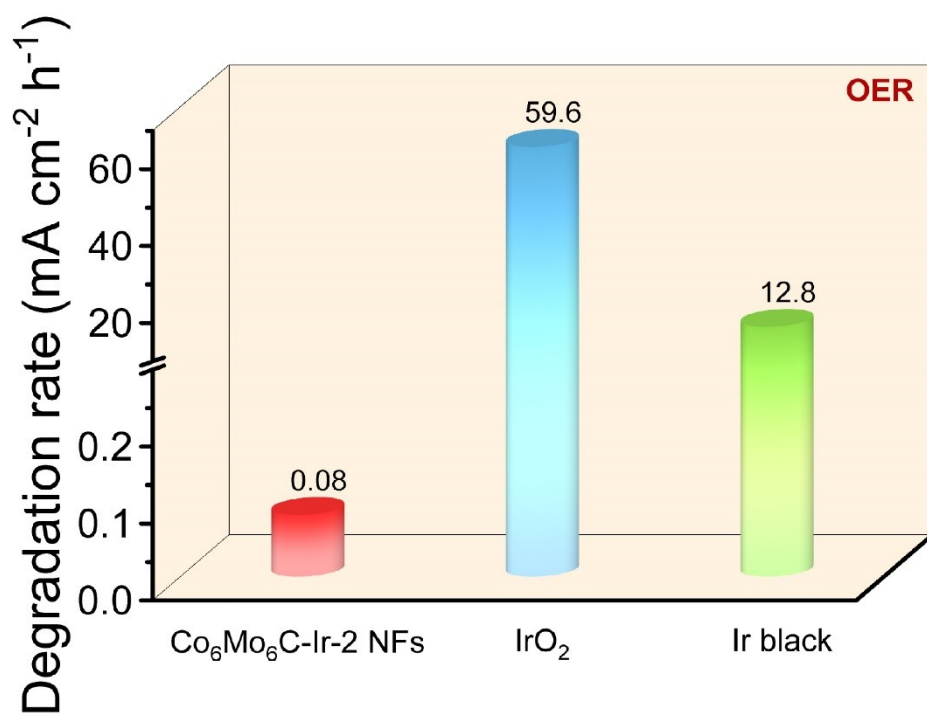

**Figure S22.** The degradation rates of catalysts for OER stability test.

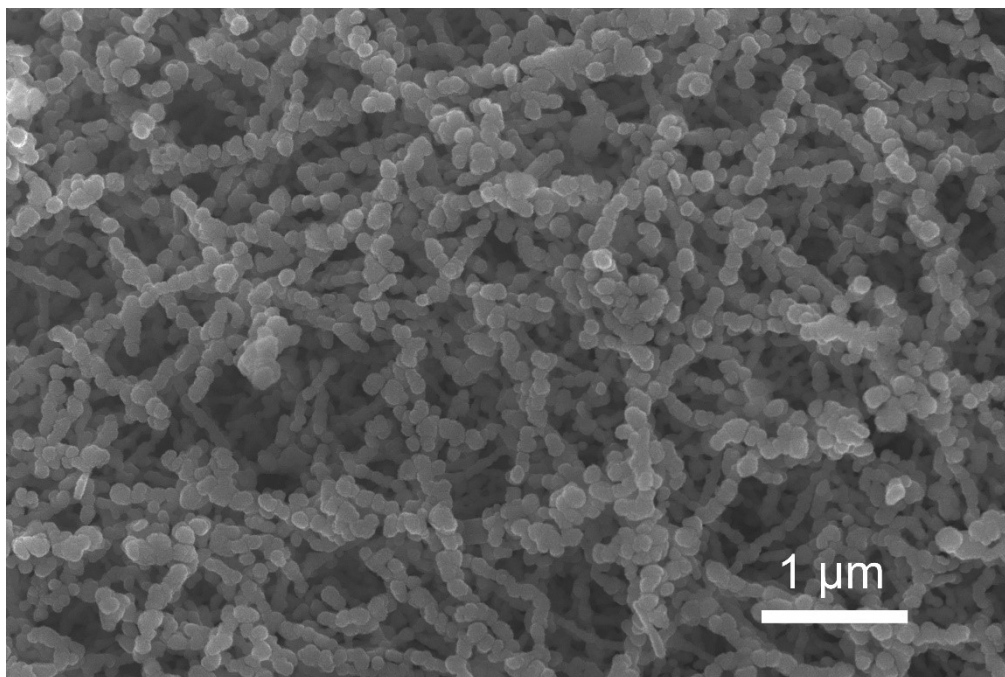

**Figure S23.** The SEM image of Co<sub>6</sub>Mo<sub>6</sub>C-Ir-2 NFs after OER stability test.



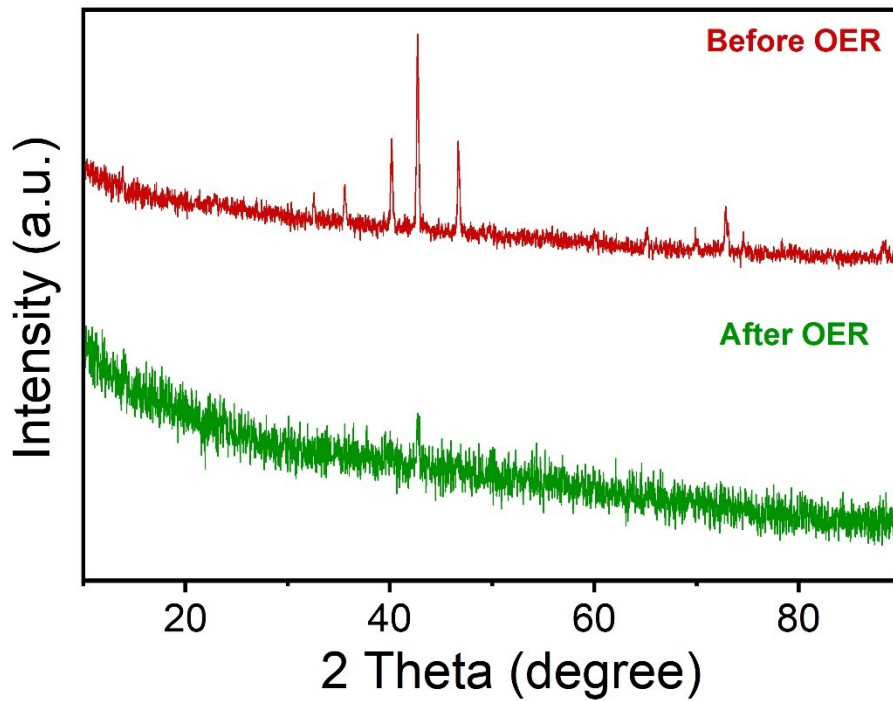

**Figure S24.** The XRD patterns of Co<sub>6</sub>Mo<sub>6</sub>C-Ir-2 NFs after OER stability test.

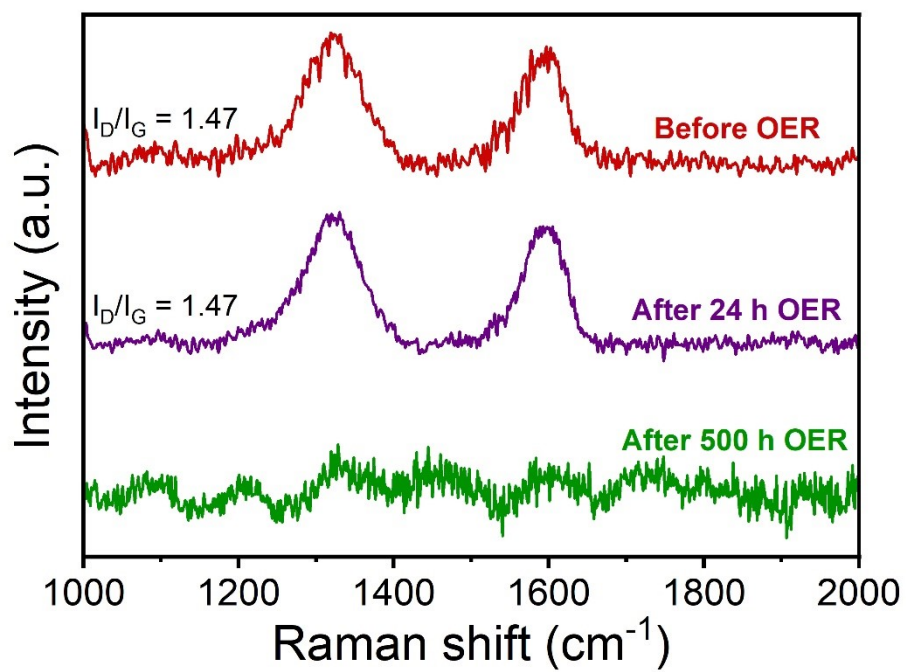

**Figure S25.** The Raman spectra of Co<sub>6</sub>Mo<sub>6</sub>C-Ir NFs before and after OER stability test.

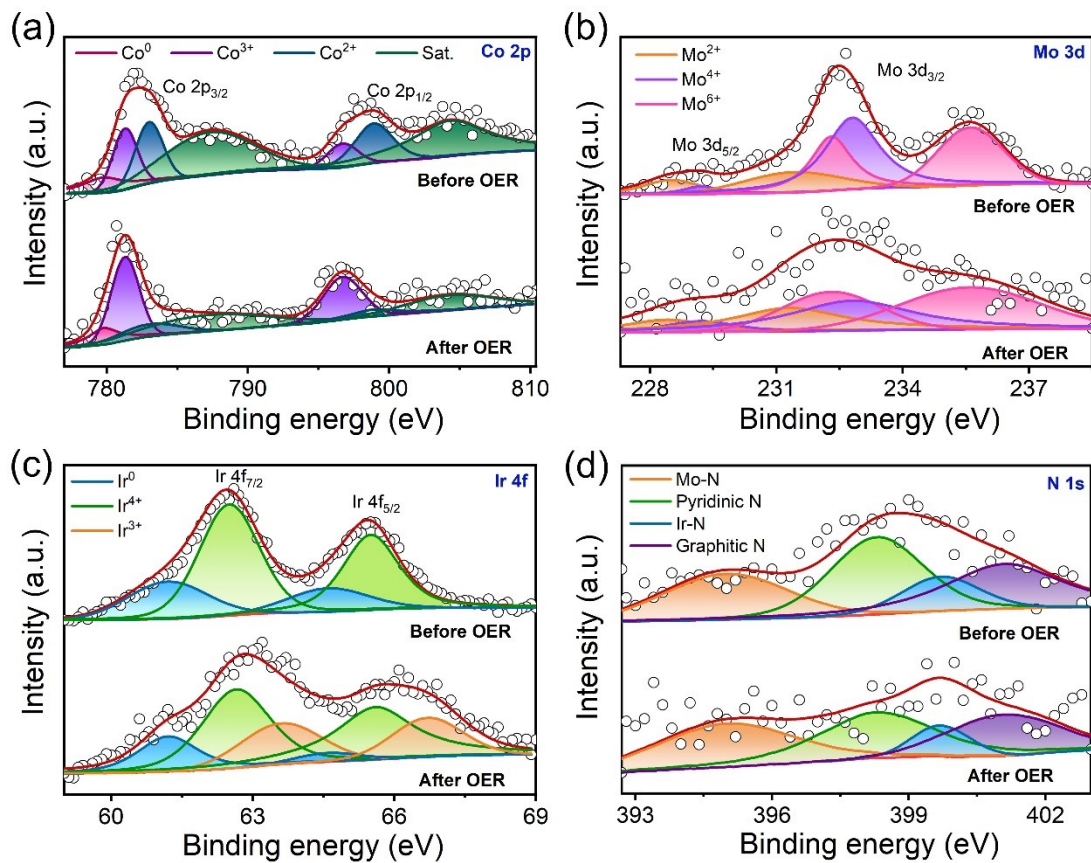

**Figure S26.** Typical high-resolution (a) Co 2p, (b) Mo 3d, (c) Ir 4f and (d) N 1s XPS spectra of Co<sub>6</sub>Mo<sub>6</sub>C-Ir-2 NFs before and after OER stability test.

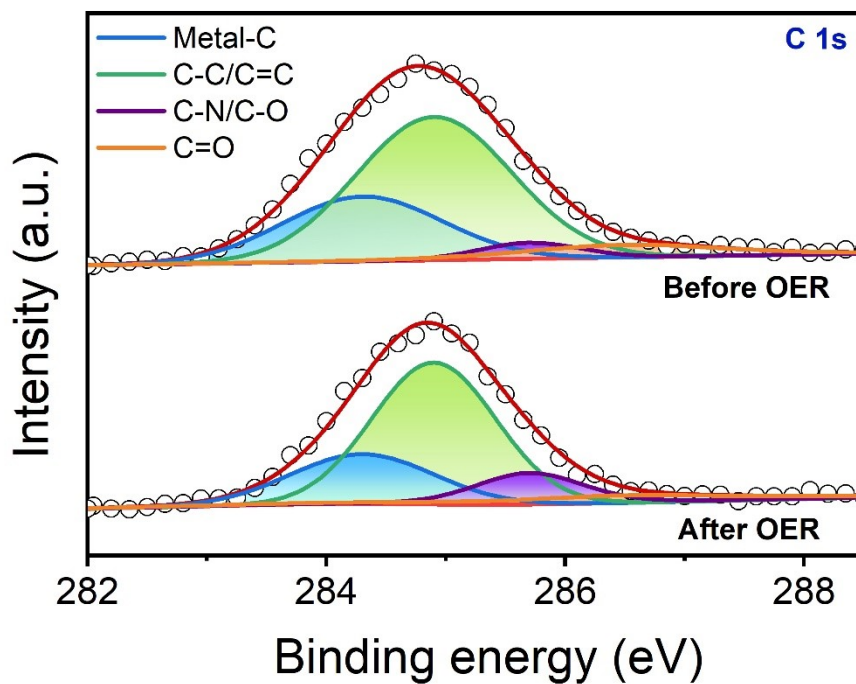

**Figure S27.** Typical high-resolution C 1s XPS spectra of  $\text{Co}_6\text{Mo}_6\text{C-Ir-2}$  NFs before and after OER stability test.

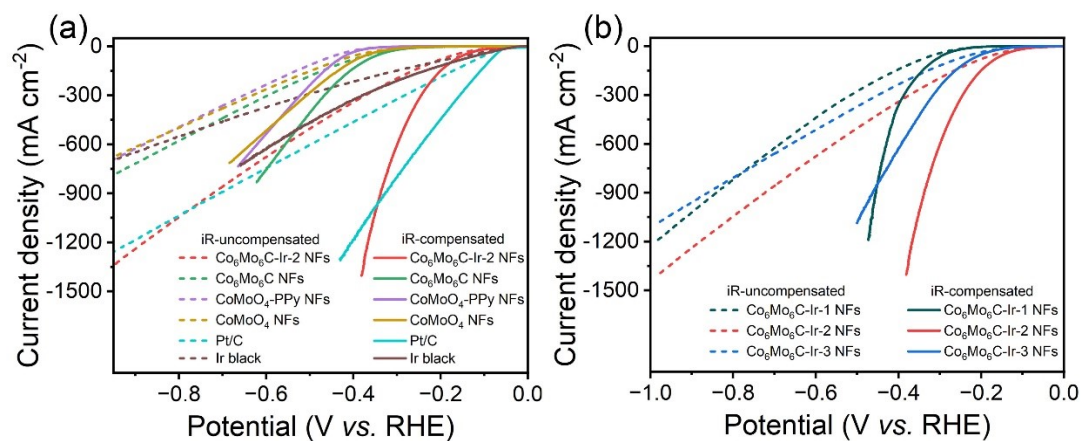

**Figure S28.** (a, b) The LSV curves of varied catalysts with and without iR compensation for HER.

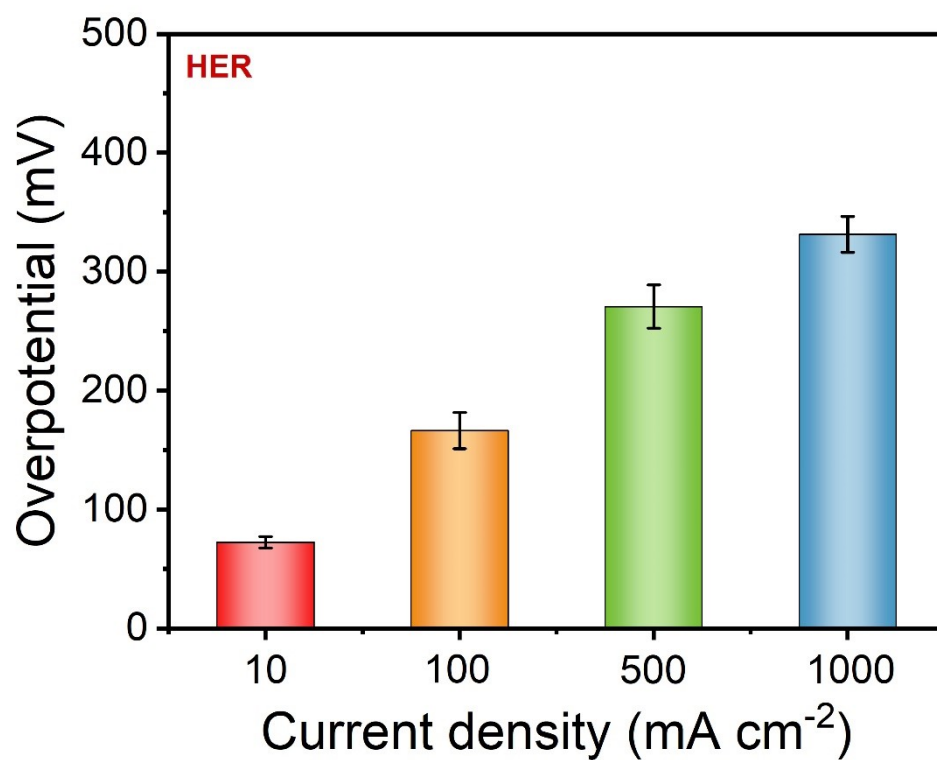

**Figure S29.** The evaluation of the HER overpotentials of Co<sub>6</sub>Mo<sub>6</sub>C-Ir NFs at 10, 100, 500 and 1000 mA cm<sup>-2</sup>. Error bars represent the standard deviations of three independent measurements under the same conditions.

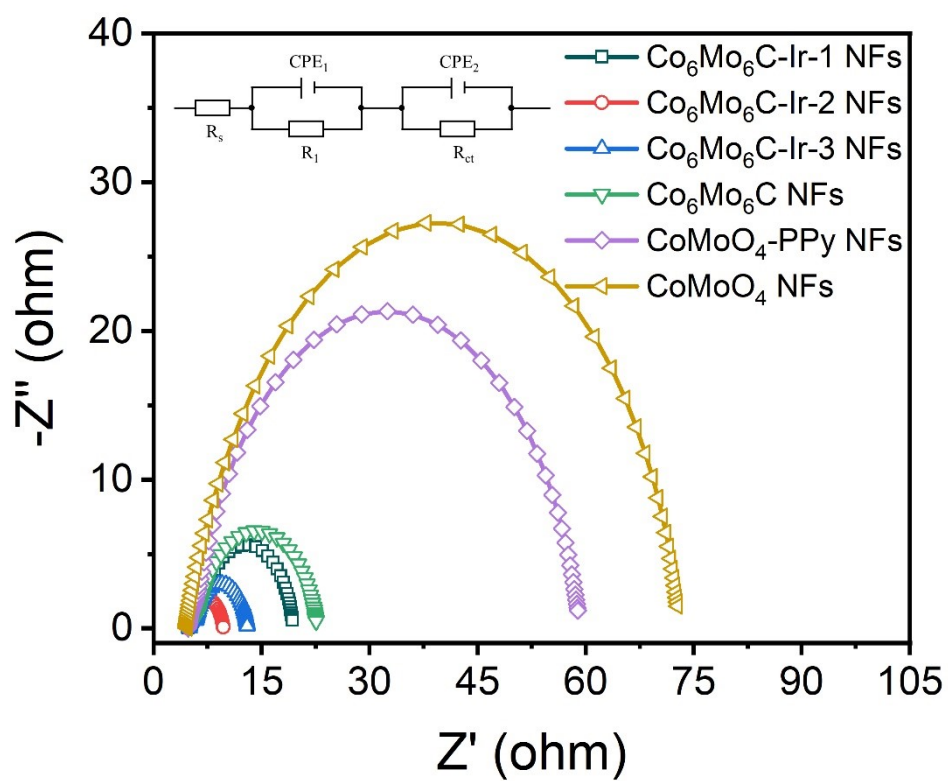

**Figure S30.** Nyquist plots of  $Co_6Mo_6C-Ir-2$  NFs and other catalysts that performed at  $-1.2$  V vs. Hg/HgO electrode.

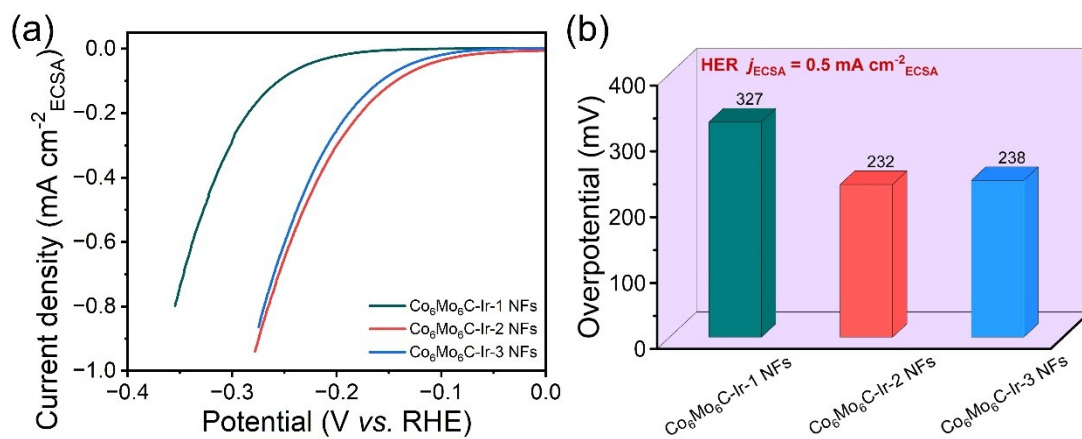

**Figure S31.** (a) HER polarization curves normalized to ECSA in 1 M KOH. (b) The corresponding specific activities at the current density of  $0.5 \text{ mA cm}^{-2}_{\text{ECSA}}$ .



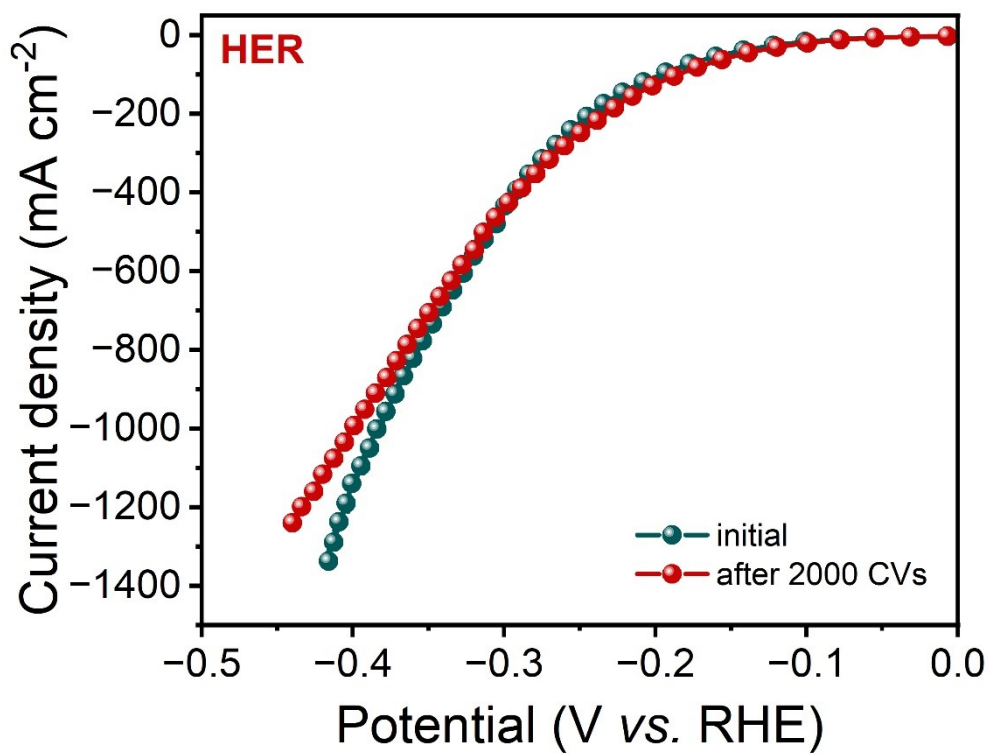

**Figure S32.** The LSV curves of Co<sub>6</sub>Mo<sub>6</sub>C-Ir-2 NFs for HER before and after 2000 CVs.

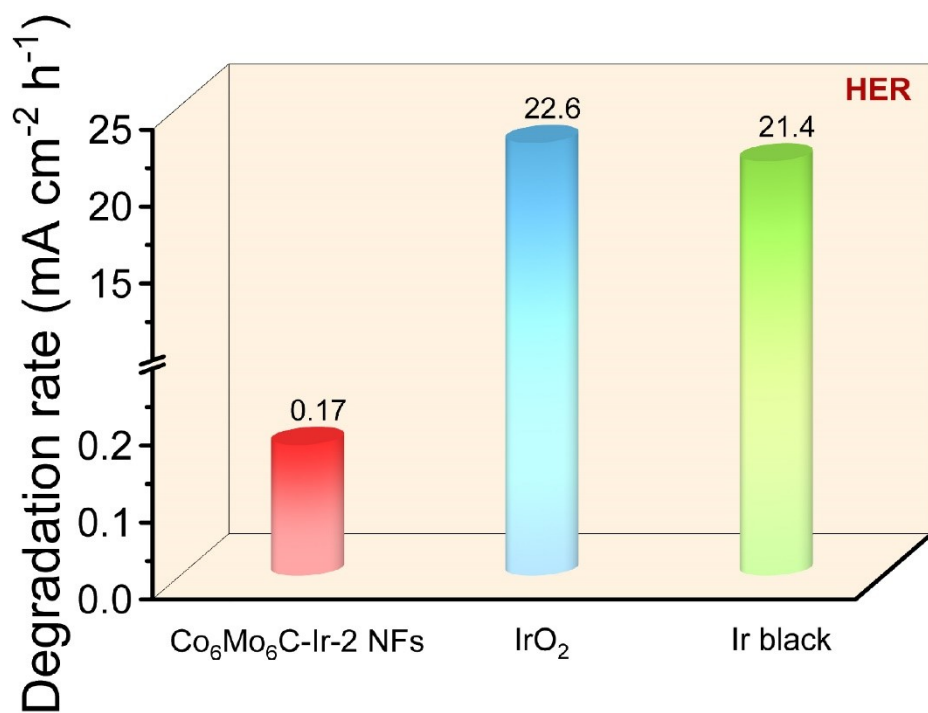

**Figure S33.** The degradation rates of catalysts for HER stability test.

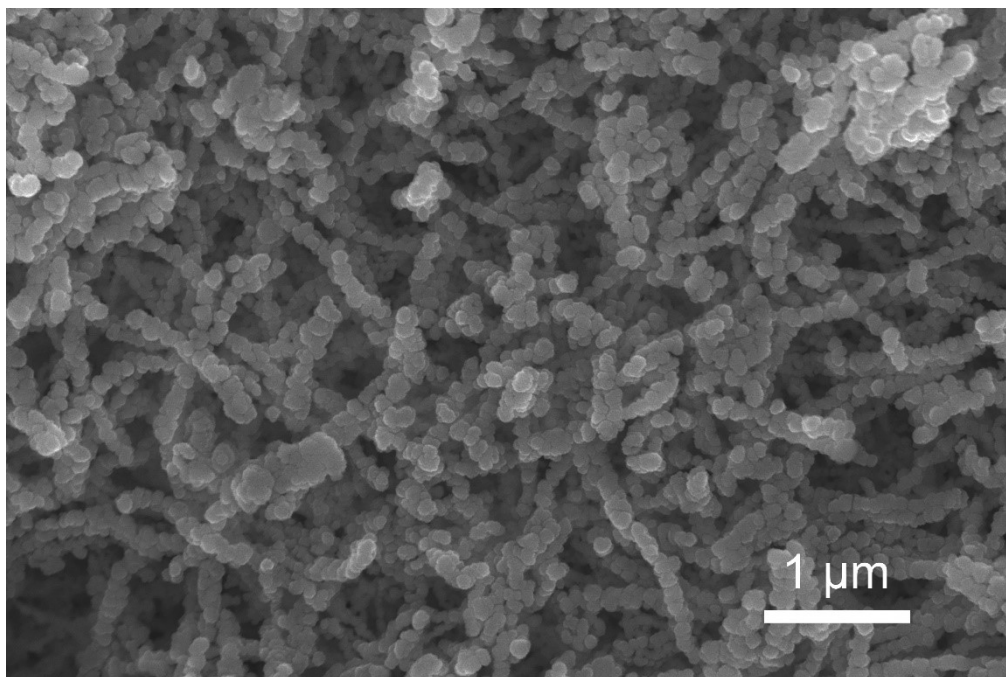

**Figure S34.** The SEM image of Co<sub>6</sub>Mo<sub>6</sub>C-Ir-2 NFs after HER stability test.

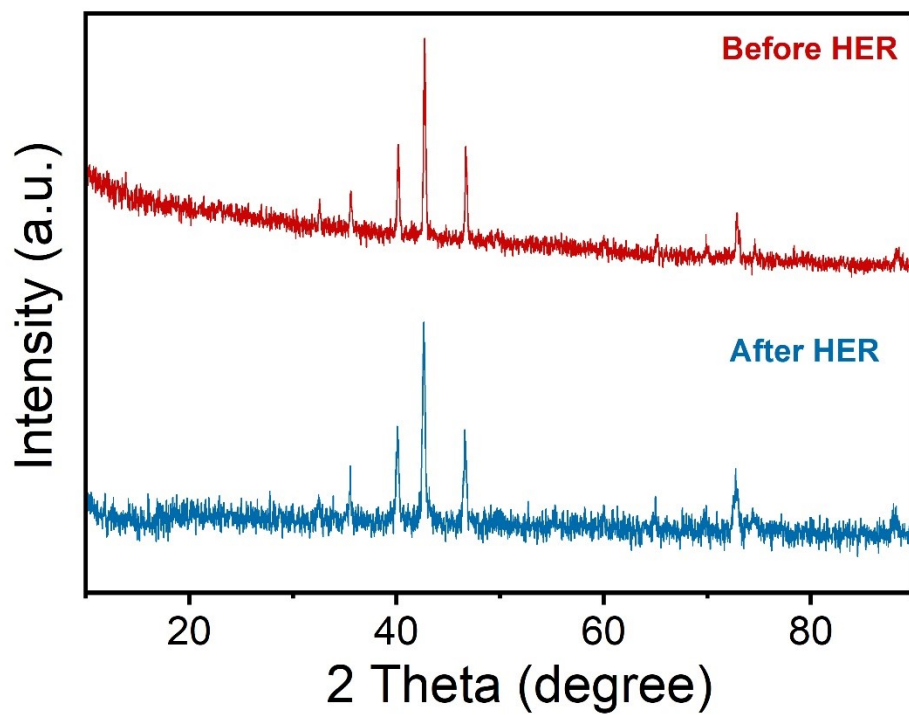

**Figure S35.** XRD patterns of  $\text{Co}_6\text{Mo}_6\text{C-Ir-2}$  NFs after HER stability test.

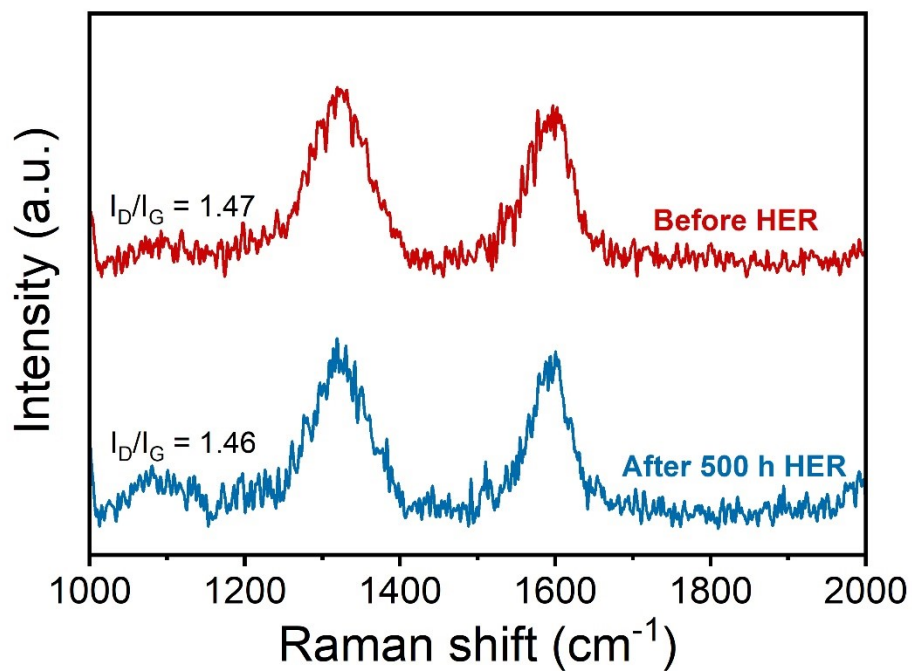

**Figure S36.** The Raman spectra of Co<sub>6</sub>Mo<sub>6</sub>C-Ir NFs before and after HER stability test.

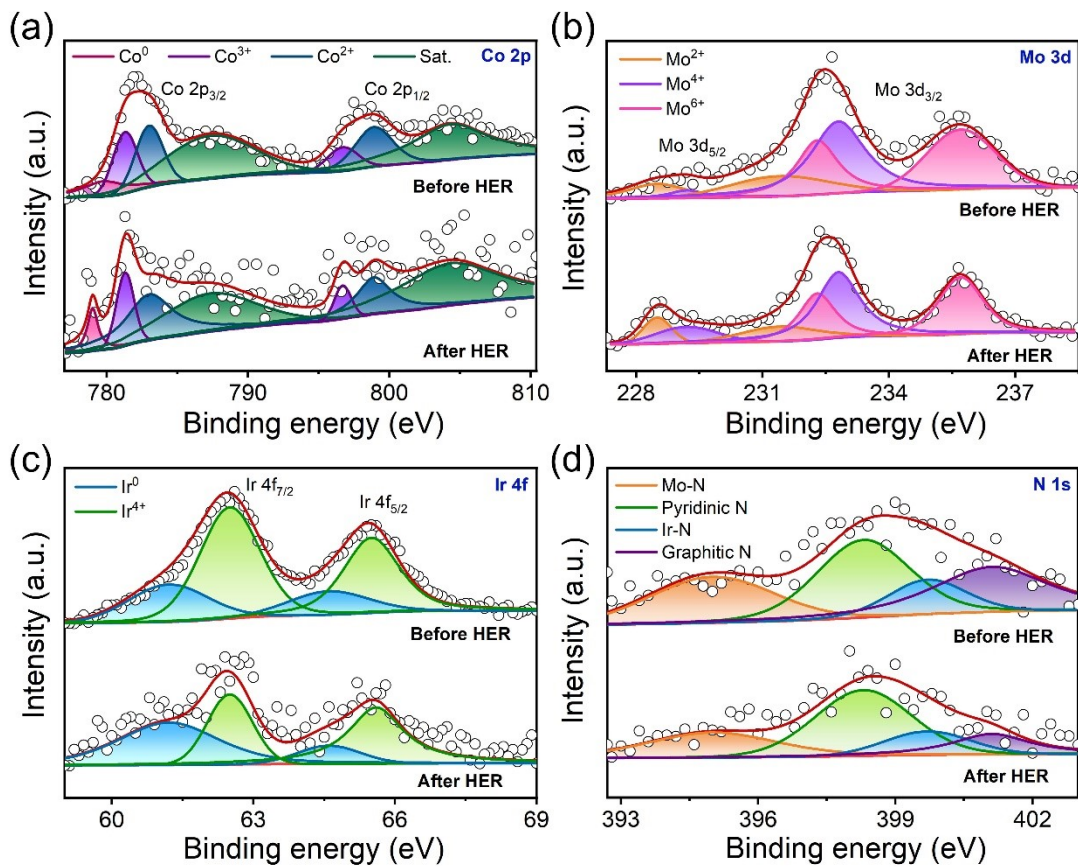

**Figure S37.** Typical high-resolution (a) Co 2p, (b) Mo 3d, (c) Ir 4f and (d) N 1s XPS spectra of Co<sub>6</sub>Mo<sub>6</sub>C-Ir-2 NFs before and after HER stability test.

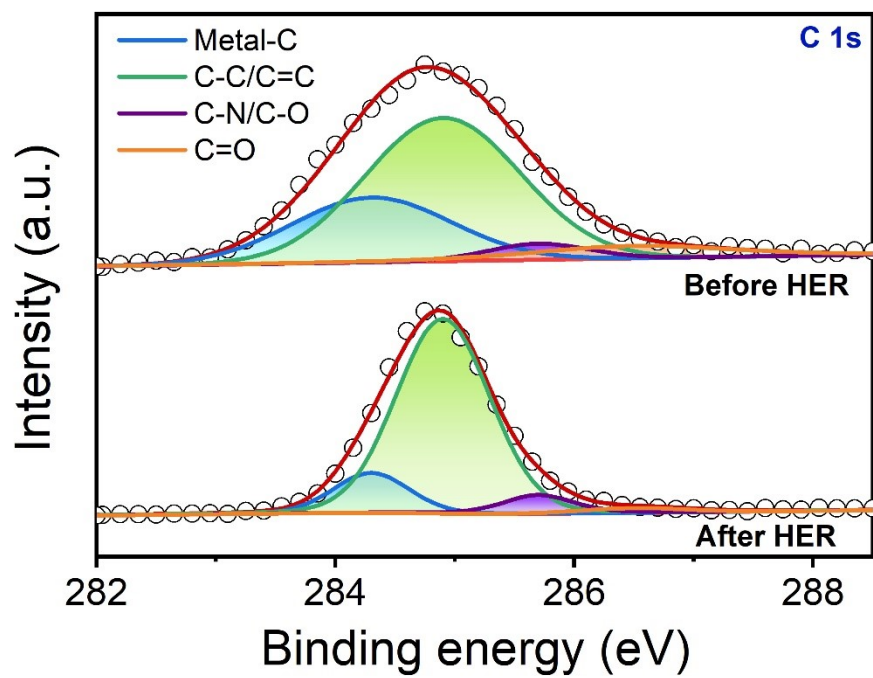

**Figure S38.** Typical high-resolution N 1s XPS spectra of  $\text{Co}_6\text{Mo}_6\text{C-Ir-2}$  NFs before and after HER stability test.

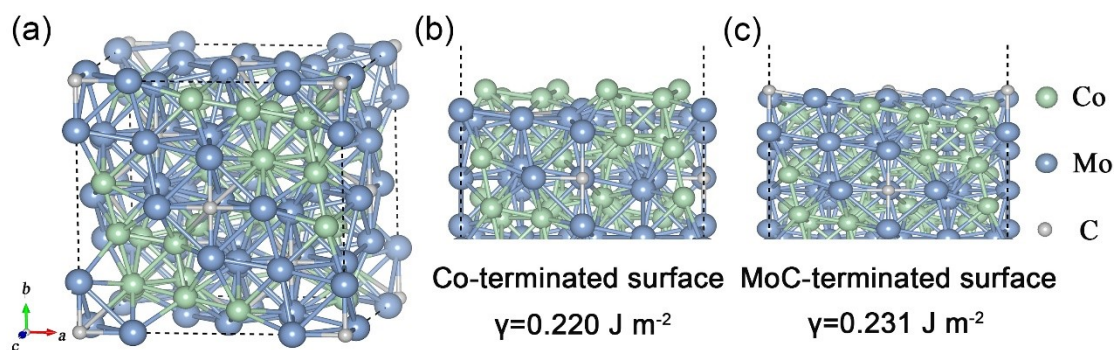

**Figure S39.** (a) The crystal structure of  $\text{Co}_6\text{Mo}_6\text{C}$  and (b, c) side view of possible exposed Co- or MoC-terminations for the low-index (100) facet, as well as the corresponding surface energies.



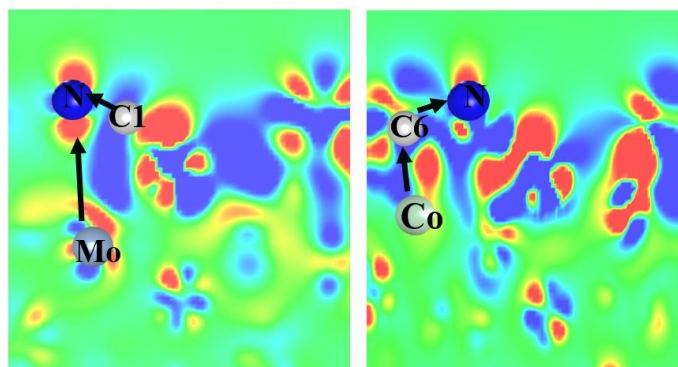

**Figure S40.** The charge density difference ( $\Delta\rho$ ) of  $\text{Co}_6\text{Mo}_6\text{C-NF}$  without Ir, in which the red and blue colors represent gaining and losing electrons, respectively, and the relevant electron transfer processes are also displayed.

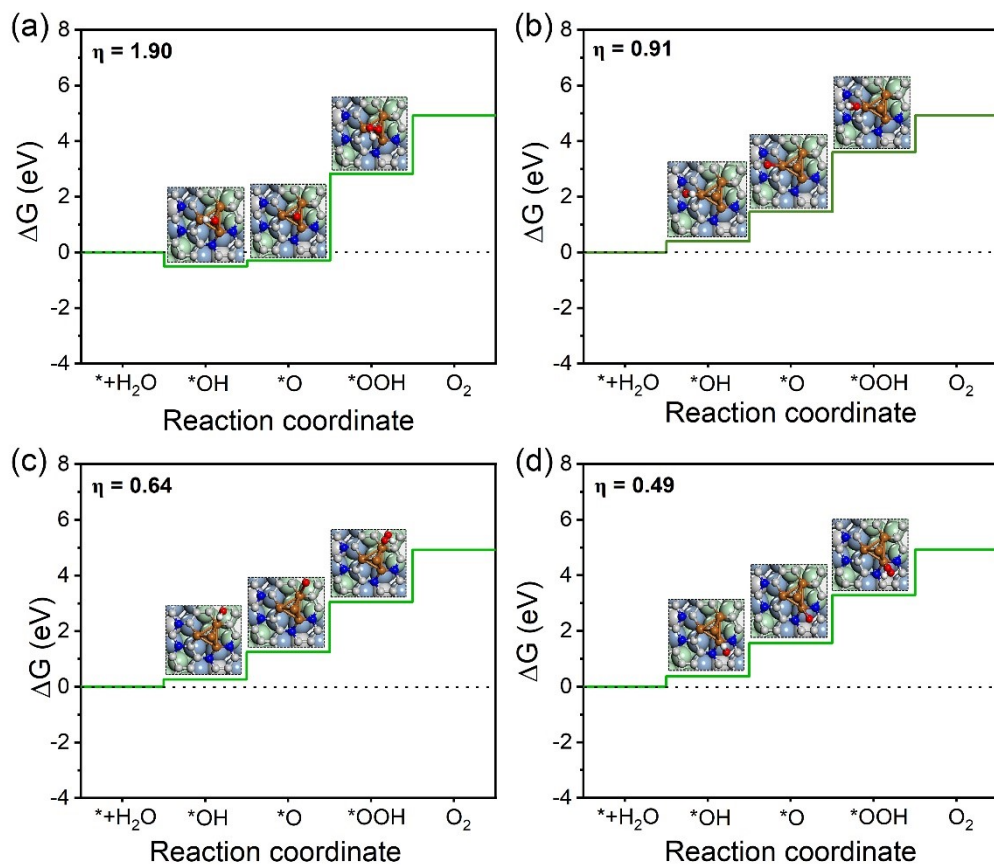

**Figure S41.** Free-energy diagrams for OER at the (a)  $T_{Ir1}$ , (b)  $T_{Ir2}$ , (c)  $T_{Ir3}$  and (d)  $T_{Ir4}$  sites.

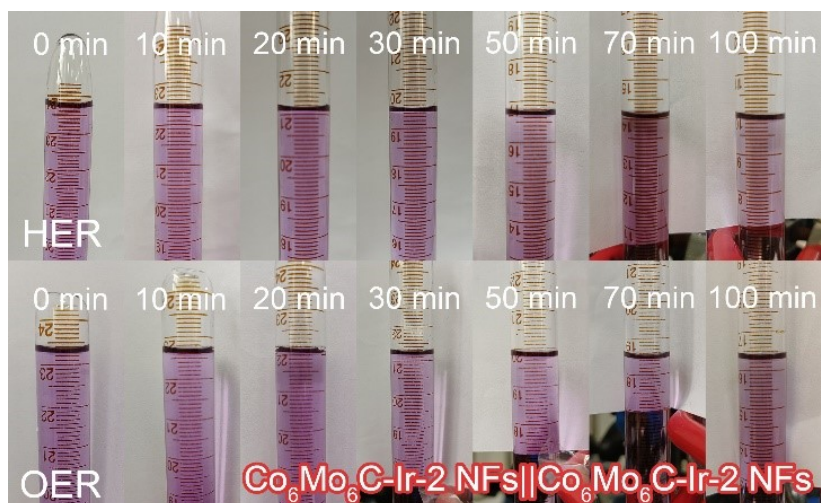

**Figure S42.** The photographs of H<sub>2</sub> and O<sub>2</sub> production of Co<sub>6</sub>Mo<sub>6</sub>C-Ir-2 NFs||Co<sub>6</sub>Mo<sub>6</sub>C-Ir-2 NFs electrolyzer.

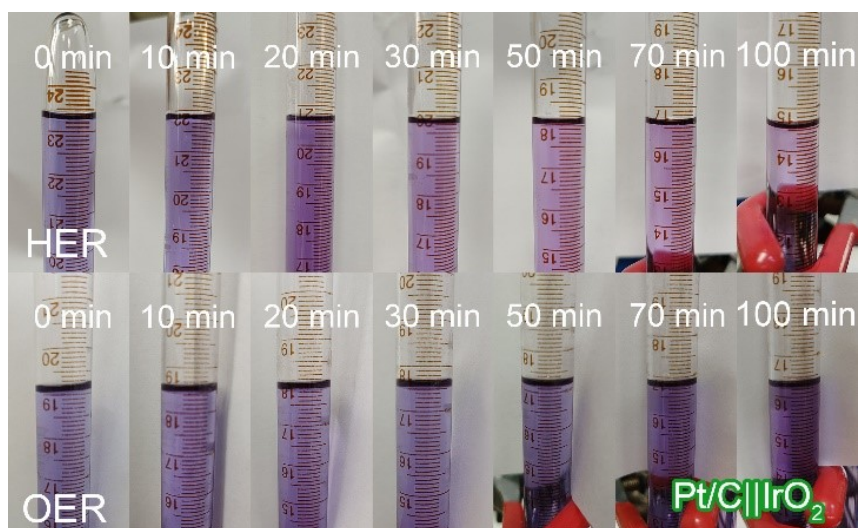

**Figure S43.** The photographs of H<sub>2</sub> and O<sub>2</sub> production of Pt/C||IrO<sub>2</sub> NFs electrolyzer.

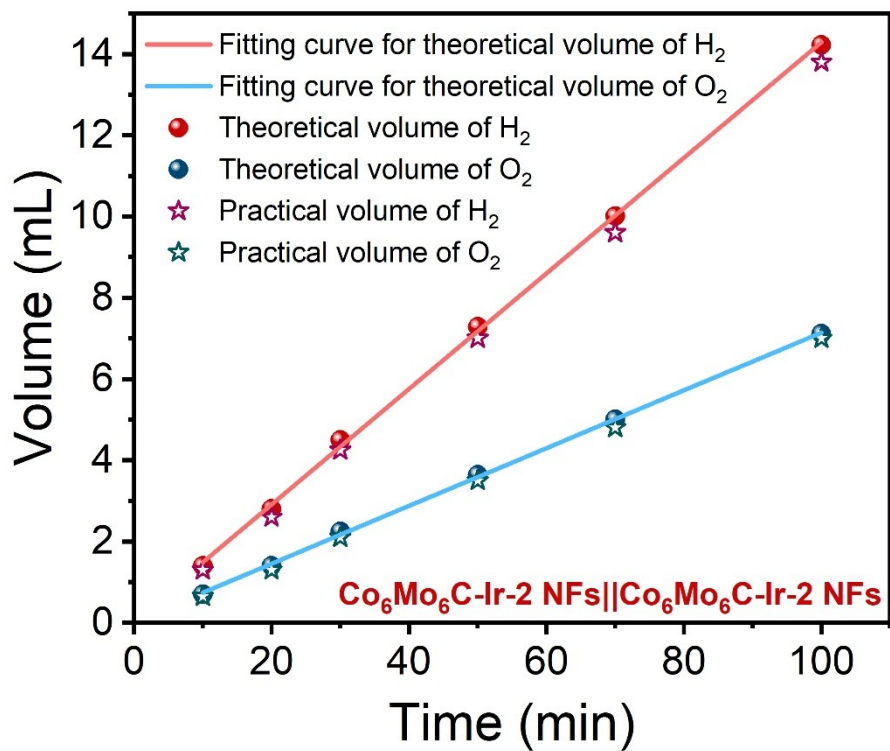

**Figure S44.** The comparison of theoretically calculated and experimentally measured evolved H<sub>2</sub> and O<sub>2</sub> gas for Co<sub>6</sub>Mo<sub>6</sub>C-Ir-2 NFs||Co<sub>6</sub>Mo<sub>6</sub>C-Ir-2 NFs electrolyzer.

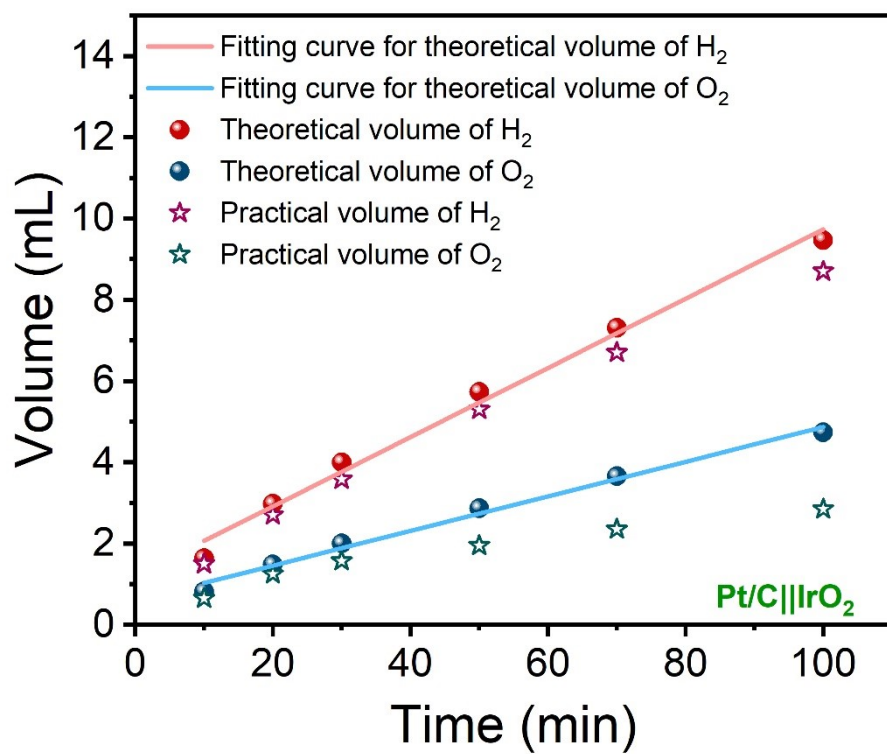

**Figure S45.** The comparison of theoretically calculated and experimentally measured evolved H<sub>2</sub> and O<sub>2</sub> gas for Pt/C||IrO<sub>2</sub> electrolyzer.

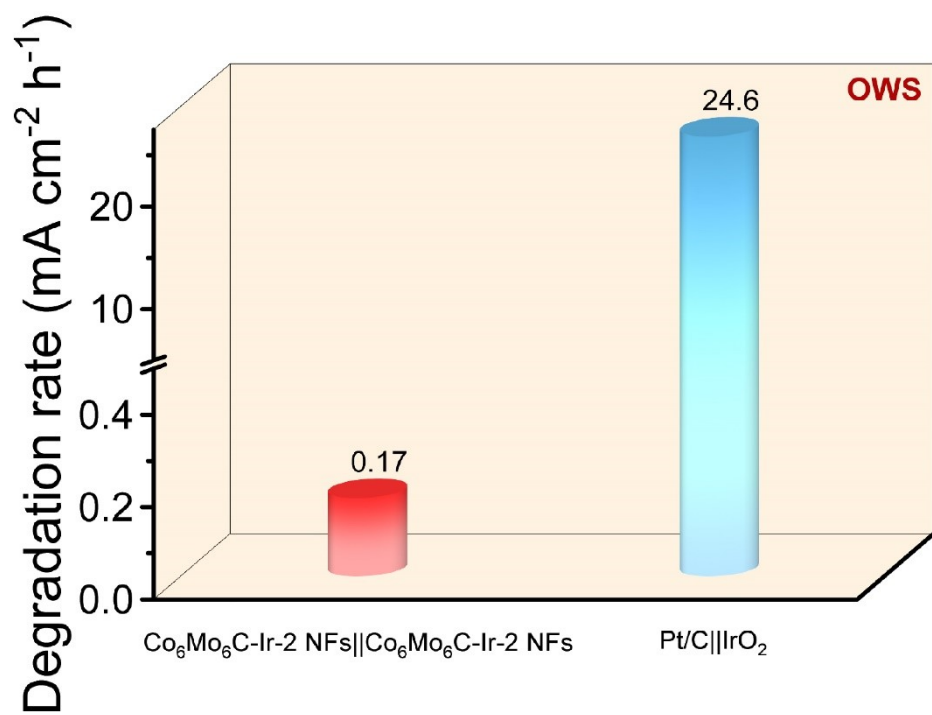

**Figure S46.** The degradation rates of electrolyzers for OWS stability test.

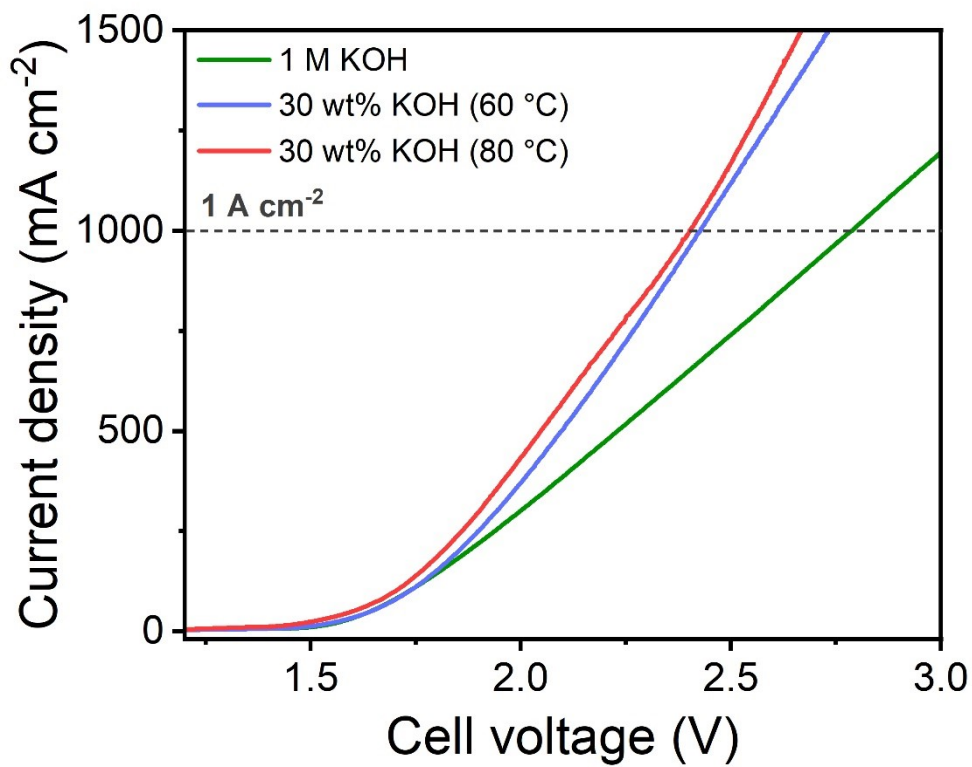

**Figure S47.** The polarization curves of Co<sub>6</sub>Mo<sub>6</sub>C-Ir-2 NFs in 1 M KOH, 30 wt% KOH (60 °C) and 30 wt% KOH (80 °C) for overall water splitting without iR compensation.



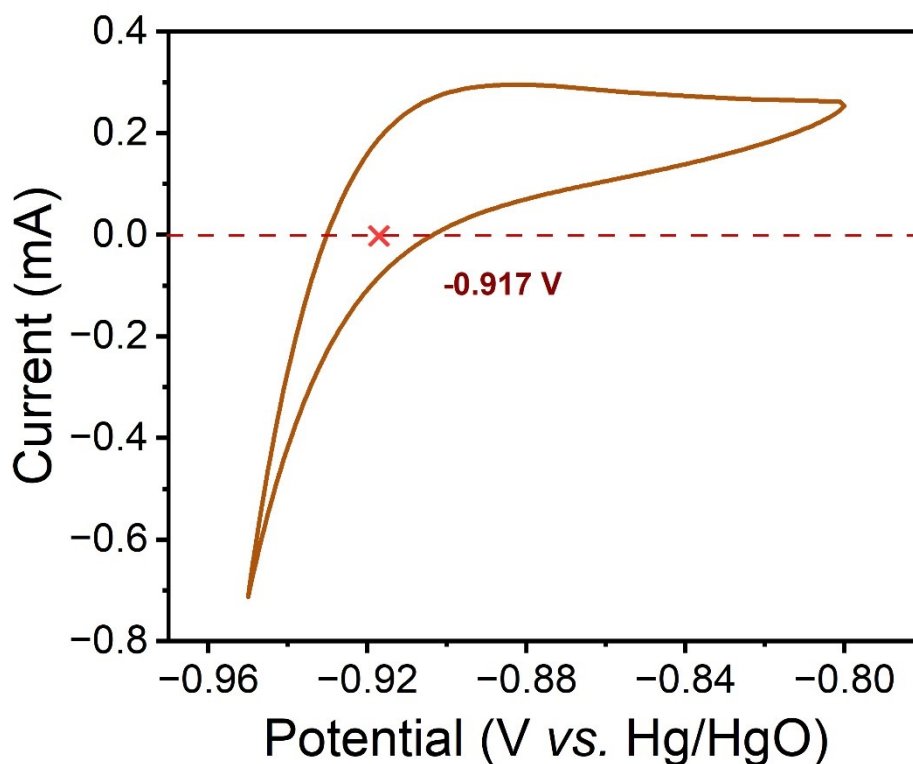

**Figure S48.** The CV curve for the calibration of the Hg/HgO reference electrode at the scan rate of  $1 \text{ mV s}^{-1}$  in  $\text{H}_2$ -saturated  $1 \text{ M KOH}$  solution.

**Note:** The calibration process of the Hg/HgO reference electrode: The  $\text{H}_2$  was introduced into  $1 \text{ M KOH}$  electrolyte until it saturated. Then, two polished Pt plate electrodes and Hg/HgO electrode served as the working electrode, the counter electrode and the pre-calibrated reference electrode, respectively. Cyclic voltammetry (CV) at the scan rate of  $1 \text{ mV s}^{-1}$  was conducted to calibrate the reference potential of the Hg/HgO electrode in the high-purity  $\text{H}_2$ -saturated  $1 \text{ M KOH}$  electrolyte. According to the result of CV test, the thermodynamic potential ( $-0.917 \text{ V}$ ) was calculated. Hence, the Nernst equation in this work can be modified as follow:  $E_{\text{RHE}} = E_{\text{Hg/HgO}} + 0.917 \text{ V}$ .

**Table S1.** The ICP results of prepared catalysts.

| <b>Catalysts</b>                              | <b>Co (wt %)</b> | <b>Mo (wt %)</b> | <b>Ir (wt %)</b> |
|-----------------------------------------------|------------------|------------------|------------------|
| <b>CoMoO<sub>4</sub> NFs</b>                  | 26.7             | 44.0             | N/A              |
| <b>CoMoO<sub>4</sub>-PPy NFs</b>              | 13.3             | 25.8             | N/A              |
| <b>Co<sub>6</sub>Mo<sub>6</sub>C NFs</b>      | 33.8             | 64.4             | N/A              |
| <b>Co<sub>6</sub>Mo<sub>6</sub>C-Ir-1 NFs</b> | 34.2             | 59.5             | 4.6              |
| <b>Co<sub>6</sub>Mo<sub>6</sub>C-Ir-2 NFs</b> | 33.7             | 58.7             | 5.9              |
| <b>Co<sub>6</sub>Mo<sub>6</sub>C-Ir-3 NFs</b> | 31.2             | 59.6             | 7.6              |

**Table S2.** Comparison of the OER activity of the Co<sub>6</sub>Mo<sub>6</sub>C-Ir-2 NFs catalyst with other reported non-noble catalysts in 1 M KOH solution.

| Catalysts                                                        | J<br>(mA cm <sup>-2</sup> ) | η<br>(mV) | Tafel slope<br>(mV dec <sup>-1</sup> ) | Reference                                        |
|------------------------------------------------------------------|-----------------------------|-----------|----------------------------------------|--------------------------------------------------|
| Co <sub>6</sub> Mo <sub>6</sub> C-Ir-2 NFs                       | 10                          | 209       | 46.8                                   | This work                                        |
|                                                                  | 100                         | 257       |                                        |                                                  |
|                                                                  | 500                         | 297       |                                        |                                                  |
|                                                                  | 1000                        | 316       |                                        |                                                  |
| Co <sub>1</sub> Mn <sub>1</sub> CH                               | 100                         | 387       | N/A                                    | J. Am. Chem. Soc.<br>2017, 139, 8320-8328.       |
|                                                                  | 1000                        | 46        |                                        |                                                  |
| Co <sub>2</sub> FeO <sub>4</sub>                                 | 10                          | 359       | 60                                     | Nat. Commun.<br>2022, 13, 179.                   |
| CoFeZr oxides/NFs                                                | 20                          | 264       | 54.2                                   | Adv. Mater.<br>2019, 31, 1901439.                |
| Ru-a-CoNi                                                        | 100                         | 285       | 66                                     | Angew. Chem.-Int. Edit.<br>2022, 61, e202209075. |
| Fe-Mo-S/Ni <sub>3</sub> S <sub>2</sub> @NF                       | 100                         | 300       | 98                                     | Chem. Eng. J.<br>2021, 404, 126483.              |
|                                                                  | 500                         | 367       |                                        |                                                  |
| (NiCo)S1.33                                                      | 10                          | 302       | N/A                                    | Nat. Commun.<br>2023, 14, 1949.                  |
| RuO <sub>2</sub> /CoO <sub>x</sub>                               | 10                          | 240       | 70                                     | Nat. Commun.<br>2022, 13, 5448.                  |
| CoO/hi-Mn <sub>3</sub> O <sub>4</sub>                            | 10                          | 378       | 61                                     | Angew. Chem.-Int. Edit.<br>2017, 56, 8539-8543.  |
| CoIr                                                             | 10                          | 235       | 70.2                                   | Adv. Mater.<br>2018, 30, 1707522.                |
| P-IrO <sub>x</sub> @DG                                           | 10                          | 248       | 52.8                                   | Small<br>2021, 17, 2100121.                      |
| S/N-CMF@Fe <sub>x</sub> Co <sub>y</sub> Ni <sub>1-x-y</sub> -MOF | 10                          | 296       | 53.5                                   | Adv. Mater.<br>2023, 10.1002/adma.202207888.     |
| NiCo <sub>2</sub> S <sub>4</sub> @Mo-CoFe LDH/NF                 | 500                         | 295       | 83                                     | Appl. Catal. B-Environ.<br>2022, 319, 121917.    |
|                                                                  | 1000                        | 332       |                                        |                                                  |
| Ru-Co/ELCO                                                       | 10                          | 247       | 49.1                                   | Angew. Chem.-Int. Edit.<br>2022, 61, e202205946. |
| CeO <sub>2</sub> -NiCoP <sub>x</sub> /NCF                        | 500                         | 455       | 72                                     | Appl. Catal. B-Environ.<br>2022, 316, 121678.    |
| N-Co <sub>6</sub> Mo <sub>6</sub> C NRs                          | 10                          | 310       | 59                                     | J. Electroanal. Chem.<br>2020, 871, 114271.      |
| NiMoO <sub>x</sub> /NiMoS                                        | 1000                        | 334       | 34                                     | Nat. Commun.<br>2020, 11, 5462.                  |
| Ru-CoO <sub>x</sub> /NF                                          | 1000                        | 370       | 134                                    | Small<br>2021, 17, 2102777.                      |

**Table S3.** Comparisons of the  $C_{dl}$ , ECSA and RF values of  $\text{Co}_6\text{Mo}_6\text{C-Ir-2}$  NFs with other catalysts.

| Catalysts                                                   | $C_{dl}$ (mF $\text{cm}^{-2}$ ) | ECSA ( $\text{cm}^2$ ) | RF    |
|-------------------------------------------------------------|---------------------------------|------------------------|-------|
| <b><math>\text{Co}_6\text{Mo}_6\text{C-Ir-1}</math> NFs</b> | 9.3                             | 20.93                  | 232.5 |
| <b><math>\text{Co}_6\text{Mo}_6\text{C-Ir-2}</math> NFs</b> | 19.9                            | 44.78                  | 497.5 |
| <b><math>\text{Co}_6\text{Mo}_6\text{C-Ir-3}</math> NFs</b> | 8.3                             | 18.68                  | 207.5 |
| <b><math>\text{Co}_6\text{Mo}_6\text{C}</math> NFs</b>      | 1.1                             | 2.48                   | 27.5  |

**Table S4.** Comparison of the HER activity of the Co<sub>6</sub>Mo<sub>6</sub>C-Ir-2 NFs catalyst with other reported non-noble catalysts in 1 M KOH solution.

| Catalysts                                             | J<br>(mA cm <sup>-2</sup> ) | $\eta$<br>(mV) | Tafel slope<br>(mV dec <sup>-1</sup> ) | Reference                                             |
|-------------------------------------------------------|-----------------------------|----------------|----------------------------------------|-------------------------------------------------------|
| Co <sub>6</sub> Mo <sub>6</sub> C-Ir-2 NFs            | 10                          | 76             | 96.1                                   | This work                                             |
|                                                       | 100                         | 177            |                                        |                                                       |
|                                                       | 500                         | 284            |                                        |                                                       |
|                                                       | 1000                        | 348            |                                        |                                                       |
| CoSn <sub>2</sub> /NF                                 | 10                          | 103            | N/A                                    | Angew. Chem.-Int. Edit.<br>2018, 57, 15237-15242.     |
| Ni-Mo <sub>x</sub> C/NC                               | 10                          | 162            | 104.8                                  | ACS Appl. Mater. Interfaces<br>2018, 10, 35025-35038  |
| Mo <sub>2</sub> C-CoO@N-CNFs                          | 10                          | 115            | 76                                     | Chem. Eng. J.<br>2023, 451, 139025.                   |
| FD-MoS <sub>2</sub> -3                                | 10                          | 174            | 89                                     | Nat. Commun.<br>2022, 13, 2193.                       |
| CoFeZr oxides/NFs                                     | 10                          | 104            | 119.3                                  | Adv. Mater.<br>2019, 31, 1901439.                     |
| HC-MoS <sub>2</sub> /Mo <sub>2</sub> C                | 1000                        | 442            | 58                                     | Nat. Commun.<br>2020, 11, 3724.                       |
| A-NiCo LDH/NF                                         | 100                         | 151            | 57                                     | Appl. Catal. B-Environ.<br>2020, 261, 118240          |
|                                                       | 1000                        | 381            |                                        |                                                       |
| S-Co <sub>0.85</sub> Se-1                             | 10                          | 108            | 59                                     | Angew. Chem.-Int. Edit.<br>2021, 60, 12360-12365.     |
| NC/Ni <sub>3</sub> Mo <sub>3</sub> N/NF               | 1000                        | 710*           | 42                                     | Appl. Catal. B-Environ.<br>2020, 272, 118956.         |
| Fe-Mo-S/Ni <sub>3</sub> S <sub>2</sub> @NF            | 100                         | 266            | 123                                    | Chem. Eng. J.<br>2021, 404, 126483.                   |
|                                                       | 500                         | 384            |                                        |                                                       |
| N-MoO <sub>2</sub> /Ni <sub>3</sub> S <sub>2</sub> NF | 1000                        | 517            | 76                                     | ACS Appl. Mater. Interfaces<br>2019, 11, 27743-27750. |
| S-Co <sub>0.85</sub> Se-1                             | 10                          | 108            | 59                                     | Angew. Chem.-Int. Edit.<br>2021, 60, 12360-12365.     |
| IrFe/NC                                               | 1000                        | 850            | 30                                     | Appl. Catal. B-Environ.<br>2019, 258, 117965.         |
| N-Co <sub>6</sub> Mo <sub>6</sub> C NRs               | 10                          | 161            | 62                                     | J. Electroanal. Chem.<br>2020, 871, 114271.           |
| IrCu NWs                                              | 10                          | 86             | 60                                     | Chem. Eng. J.<br>2021, 416, 129128.                   |
|                                                       | 100                         | 180*           |                                        |                                                       |
| Co-Mo <sub>2</sub> C                                  | 10                          | 92             | 89                                     | Appl. Catal. B-Environ.<br>2021, 284, 119738.         |

\* represents that the displayed value is estimated through the given figure from the literature.

**Table S5.** The structure parameters for the calculation model of composite Co<sub>6</sub>Mo<sub>6</sub>C-Ir system.

Lattice parameters

| a        | b        | c        | alpha   | beta    | gamma   |
|----------|----------|----------|---------|---------|---------|
| 21.44510 | 10.15250 | 30.00000 | 90.0000 | 90.0000 | 90.0000 |

Structure parameters

|    | Atom | x       | y       | z       |
|----|------|---------|---------|---------|
| 1  | Co   | 0.41773 | 0.83566 | 0.55557 |
| 2  | Co   | 0.16586 | 0.16732 | 0.49577 |
| 3  | Co   | 0.0421  | 0.91579 | 0.46409 |
| 4  | Co   | 0.20869 | 0.41738 | 0.40133 |
| 5  | Co   | 0.4579  | 0.08421 | 0.46409 |
| 6  | Co   | 0.08254 | 0.33659 | 0.49434 |
| 7  | Co   | 0.16864 | 0.33494 | 0.55877 |
| 8  | Co   | 0.41677 | 0.66476 | 0.49457 |
| 9  | Co   | 0.29211 | 0.41579 | 0.46409 |
| 10 | Co   | 0.45869 | 0.91738 | 0.40133 |
| 11 | Co   | 0.2079  | 0.58421 | 0.46409 |
| 12 | Co   | 0.33356 | 0.83365 | 0.49644 |
| 13 | Co   | 0.07656 | 0.18159 | 0.55796 |
| 14 | Co   | 0.29131 | 0.58262 | 0.40133 |
| 15 | Co   | 0.04131 | 0.08262 | 0.40133 |
| 16 | Co   | 0.33897 | 0.66461 | 0.55702 |
| 17 | Co   | 0.31291 | 0.62581 | 0.47914 |
| 18 | Co   | 0.04988 | 0.42006 | 0.565   |
| 19 | Co   | 0.19803 | 0.09785 | 0.56725 |
| 20 | Co   | 0.0629  | 0.12581 | 0.47914 |
| 21 | Co   | 0.29644 | 0.90852 | 0.5708  |
| 22 | Co   | 0.45116 | 0.59538 | 0.56642 |

|    |    |         |         |         |
|----|----|---------|---------|---------|
| 23 | Co | 0.1871  | 0.37419 | 0.47914 |
| 24 | Co | 0.4371  | 0.87419 | 0.47914 |
| 25 | Co | 0.92297 | 0.81565 | 0.55981 |
| 26 | Co | 0.66717 | 0.16283 | 0.49386 |
| 27 | Co | 0.54211 | 0.91579 | 0.46409 |
| 28 | Co | 0.70869 | 0.41738 | 0.40133 |
| 29 | Co | 0.9579  | 0.08421 | 0.46409 |
| 30 | Co | 0.58366 | 0.33401 | 0.49473 |
| 31 | Co | 0.66164 | 0.33087 | 0.5562  |
| 32 | Co | 0.91639 | 0.66335 | 0.49478 |
| 33 | Co | 0.79211 | 0.41579 | 0.46409 |
| 34 | Co | 0.95869 | 0.91738 | 0.40133 |
| 35 | Co | 0.7079  | 0.58421 | 0.46409 |
| 36 | Co | 0.83513 | 0.82948 | 0.49764 |
| 37 | Co | 0.58208 | 0.16371 | 0.5558  |
| 38 | Co | 0.79131 | 0.58262 | 0.40133 |
| 39 | Co | 0.54131 | 0.08262 | 0.40133 |
| 40 | Co | 0.83341 | 0.65629 | 0.56493 |
| 41 | Co | 0.81291 | 0.62581 | 0.47914 |
| 42 | Co | 0.55179 | 0.40804 | 0.56613 |
| 43 | Co | 0.70212 | 0.09765 | 0.56682 |
| 44 | Co | 0.56291 | 0.12581 | 0.47914 |
| 45 | Co | 0.80796 | 0.88544 | 0.57161 |
| 46 | Co | 0.94592 | 0.58101 | 0.56548 |
| 47 | Co | 0.6871  | 0.37419 | 0.47914 |
| 48 | Co | 0.9371  | 0.87419 | 0.47914 |
| 49 | Mo | 0.252   | 0.50298 | 0.53983 |
| 50 | Mo | 0.9987  | 0.50084 | 0.50104 |
| 51 | Mo | 0.39945 | 0.49911 | 0.43285 |

|    |    |         |         |         |
|----|----|---------|---------|---------|
| 52 | Mo | 0.35056 | 0.00089 | 0.43285 |
| 53 | Mo | 0.24956 | 0.79889 | 0.43285 |
| 54 | Mo | 0.49956 | 0.29889 | 0.43285 |
| 55 | Mo | 0.22462 | 0.75427 | 0.52261 |
| 56 | Mo | 0.47392 | 0.25052 | 0.52203 |
| 57 | Mo | 0.375   | 0.25    | 0.45074 |
| 58 | Mo | 0.375   | 0.75    | 0.41388 |
| 59 | Mo | 0.12665 | 0.55129 | 0.52238 |
| 60 | Mo | 0.37621 | 0.4497  | 0.52268 |
| 61 | Mo | 0.125   | 0.75    | 0.45074 |
| 62 | Mo | 0.27488 | 0.24929 | 0.52332 |
| 63 | Mo | 0.12456 | 0.95281 | 0.52195 |
| 64 | Mo | 0.14945 | 0.99911 | 0.43285 |
| 65 | Mo | 0.25021 | 0.00162 | 0.50236 |
| 66 | Mo | 0.00044 | 0.70111 | 0.43285 |
| 67 | Mo | 0.99778 | 0.00199 | 0.5391  |
| 68 | Mo | 0.10055 | 0.50089 | 0.43285 |
| 69 | Mo | 0.125   | 0.25    | 0.41388 |
| 70 | Mo | 0.37314 | 0.04974 | 0.52199 |
| 71 | Mo | 0.02717 | 0.74555 | 0.52265 |
| 72 | Mo | 0.25045 | 0.20111 | 0.43285 |
| 73 | Mo | 0.75201 | 0.49708 | 0.55009 |
| 74 | Mo | 0.49954 | 0.49725 | 0.50141 |
| 75 | Mo | 0.89945 | 0.49911 | 0.43285 |
| 76 | Mo | 0.85056 | 0.00089 | 0.43285 |
| 77 | Mo | 0.74956 | 0.79889 | 0.43285 |
| 78 | Mo | 0.99956 | 0.29889 | 0.43285 |
| 79 | Mo | 0.72623 | 0.74513 | 0.5265  |
| 80 | Mo | 0.97202 | 0.25408 | 0.52329 |



|     |    |         |         |         |
|-----|----|---------|---------|---------|
| 81  | Mo | 0.875   | 0.25    | 0.45074 |
| 82  | Mo | 0.875   | 0.75    | 0.41388 |
| 83  | Mo | 0.62635 | 0.54832 | 0.52255 |
| 84  | Mo | 0.87024 | 0.44811 | 0.52386 |
| 85  | Mo | 0.625   | 0.75    | 0.45074 |
| 86  | Mo | 0.77394 | 0.24679 | 0.52157 |
| 87  | Mo | 0.62636 | 0.94798 | 0.52259 |
| 88  | Mo | 0.64945 | 0.99015 | 0.50312 |
| 90  | Mo | 0.50045 | 0.70111 | 0.43285 |
| 91  | Mo | 0.5001  | 0.99914 | 0.53927 |
| 92  | Mo | 0.60056 | 0.50089 | 0.43285 |
| 93  | Mo | 0.625   | 0.25    | 0.41388 |
| 94  | Mo | 0.87356 | 0.04601 | 0.52286 |
| 95  | Mo | 0.52662 | 0.74616 | 0.52084 |
| 96  | Mo | 0.75045 | 0.20111 | 0.43285 |
| 97  | C  | 0.25    | 0       | 0.43163 |
| 98  | C  | 0       | 0.5     | 0.43163 |
| 99  | C  | 0.12615 | 0.75231 | 0.52635 |
| 100 | C  | 0.37445 | 0.24957 | 0.5252  |
| 101 | C  | 0.75    | 0       | 0.43163 |
| 102 | C  | 0.5     | 0.5     | 0.43163 |
| 103 | C  | 0.62644 | 0.74817 | 0.52584 |
| 104 | C  | 0.87289 | 0.24735 | 0.52369 |
| 105 | C  | 0.06844 | 0.99859 | 0.6263  |
| 106 | C  | 0.1677  | 0.1226  | 0.63153 |
| 107 | C  | 0.03488 | 0.1245  | 0.6192  |
| 108 | C  | 0.13467 | 0.99767 | 0.63192 |
| 109 | C  | 0.26709 | 0.99838 | 0.63134 |
| 110 | C  | 0.36645 | 0.12639 | 0.62674 |

|     |   |         |         |         |
|-----|---|---------|---------|---------|
| 111 | C | 0.2344  | 0.12457 | 0.63093 |
| 112 | C | 0.33368 | 0.00025 | 0.6279  |
| 113 | C | 0.46553 | 0.00248 | 0.62005 |
| 114 | C | 0.56399 | 0.13023 | 0.62077 |
| 115 | C | 0.43233 | 0.12814 | 0.62368 |
| 116 | C | 0.53162 | 0.00274 | 0.61945 |
| 117 | C | 0.66349 | 0.00536 | 0.62433 |
| 118 | C | 0.76414 | 0.13209 | 0.62215 |
| 119 | C | 0.6306  | 0.13128 | 0.62173 |
| 120 | C | 0.72995 | 0.00947 | 0.62565 |
| 121 | C | 0.8637  | 0.00673 | 0.61966 |
| 122 | C | 0.96583 | 0.12819 | 0.61849 |
| 123 | C | 0.83197 | 0.13193 | 0.61878 |
| 124 | C | 0.93326 | 0.00462 | 0.61742 |
| 125 | C | 0.0679  | 0.24879 | 0.62431 |
| 126 | C | 0.16752 | 0.37455 | 0.62669 |
| 127 | C | 0.03521 | 0.37465 | 0.629   |
| 128 | C | 0.13515 | 0.2483  | 0.62617 |
| 129 | C | 0.26754 | 0.24903 | 0.62822 |
| 130 | C | 0.36584 | 0.37483 | 0.6279  |
| 131 | C | 0.23411 | 0.3737  | 0.62483 |
| 132 | C | 0.33327 | 0.2497  | 0.62808 |
| 133 | C | 0.4645  | 0.25324 | 0.62649 |
| 134 | C | 0.56505 | 0.3801  | 0.63045 |
| 135 | C | 0.43166 | 0.37555 | 0.62945 |
| 136 | C | 0.53162 | 0.25588 | 0.62479 |
| 137 | C | 0.66462 | 0.25893 | 0.62252 |
| 138 | C | 0.76532 | 0.377   | 0.61954 |
| 139 | C | 0.63189 | 0.38514 | 0.62313 |

|     |   |         |         |         |
|-----|---|---------|---------|---------|
| 140 | C | 0.73121 | 0.25395 | 0.62008 |
| 141 | C | 0.86452 | 0.25217 | 0.62149 |
| 142 | C | 0.96915 | 0.37606 | 0.62502 |
| 143 | C | 0.93295 | 0.25503 | 0.62059 |
| 144 | C | 0.06904 | 0.50063 | 0.62948 |
| 145 | C | 0.16713 | 0.62488 | 0.63201 |
| 146 | C | 0.03779 | 0.62707 | 0.62887 |
| 147 | C | 0.13518 | 0.50073 | 0.63011 |
| 148 | C | 0.2661  | 0.49944 | 0.62539 |
| 149 | C | 0.36531 | 0.6238  | 0.62568 |
| 150 | C | 0.23307 | 0.62434 | 0.63012 |
| 151 | C | 0.33261 | 0.49855 | 0.62582 |
| 152 | C | 0.46528 | 0.50181 | 0.62936 |
| 153 | C | 0.56732 | 0.63    | 0.62957 |
| 154 | C | 0.43268 | 0.62584 | 0.63032 |
| 155 | C | 0.53295 | 0.50412 | 0.62893 |
| 156 | C | 0.63252 | 0.63056 | 0.63043 |
| 157 | C | 0.73094 | 0.50193 | 0.62679 |
| 158 | C | 0.97246 | 0.6261  | 0.62578 |
| 159 | C | 0.83217 | 0.63358 | 0.62629 |
| 160 | C | 0.06888 | 0.75162 | 0.6288  |
| 161 | C | 0.16714 | 0.87304 | 0.63444 |
| 162 | C | 0.03653 | 0.87671 | 0.62336 |
| 163 | C | 0.1348  | 0.75027 | 0.6328  |
| 164 | C | 0.26569 | 0.74826 | 0.63139 |
| 165 | C | 0.36597 | 0.87474 | 0.62426 |
| 166 | C | 0.23375 | 0.87263 | 0.63392 |
| 167 | C | 0.33221 | 0.74807 | 0.62578 |
| 168 | C | 0.46635 | 0.74967 | 0.62475 |

|     |    |         |         |         |
|-----|----|---------|---------|---------|
| 169 | C  | 0.56499 | 0.87676 | 0.62217 |
| 170 | C  | 0.43304 | 0.87503 | 0.62074 |
| 171 | C  | 0.53336 | 0.75242 | 0.62597 |
| 172 | C  | 0.762   | 0.88701 | 0.63245 |
| 173 | C  | 0.63049 | 0.87933 | 0.62351 |
| 174 | C  | 0.7253  | 0.76929 | 0.64435 |
| 175 | C  | 0.96896 | 0.8781  | 0.61779 |
| 176 | C  | 0.82951 | 0.89585 | 0.63828 |
| 177 | C  | 0.93852 | 0.75363 | 0.62698 |
| 178 | N  | 0.83008 | 0.36388 | 0.62967 |
| 179 | N  | 0.66447 | 0.50713 | 0.63128 |
| 180 | N  | 0.93999 | 0.50139 | 0.62525 |
| 181 | N  | 0.66376 | 0.75813 | 0.62986 |
| 182 | Ir | 0.8686  | 0.49695 | 0.66925 |
| 183 | Ir | 0.76571 | 0.62569 | 0.6726  |
| 184 | Ir | 0.87125 | 0.75492 | 0.67106 |
| 185 | Ir | 0.84185 | 0.60998 | 0.73833 |

**Table S6.** Comparison of the OWS activity of the Co<sub>6</sub>Mo<sub>6</sub>C-Ir-2 NFs catalyst with other reported non-noble catalysts in 1 M KOH solution.

| Catalysts                                             | J (mA cm <sup>-2</sup> ) | Voltage (V) | Reference                                      |
|-------------------------------------------------------|--------------------------|-------------|------------------------------------------------|
| Co <sub>6</sub> Mo <sub>6</sub> C-Ir-2 NFs            | 10                       | 1.50        | this work                                      |
|                                                       | 100                      | 1.73        |                                                |
|                                                       | 1000                     | 2.79        |                                                |
| Ir <sub>1</sub> @Co/NC                                | 10                       | 1.603       | Angew. Chem.-Int. Edit. 2019, 58, 11868-11873. |
| Mo <sub>2</sub> C-CoO@N-CNFs                          | 10                       | 1.56        | Chem. Eng. J. 2023, 451, 139025.               |
| MoP-Mo <sub>2</sub> C/NPC                             | 10                       | 1.55        | Chem. Eng. J. 2022, 431,133719.                |
|                                                       | 100                      | 1.77        |                                                |
| CoMnO <sub>x</sub> @CN                                | 108                      | 1.8         | J. Am. Chem. Soc. 2015, 137, 14305-14312.      |
| NiS <sub>2</sub> /CoS <sub>2</sub>                    | 10                       | 1.78        | Adv. Mater. 2017, 29, 1704681.                 |
| CoFeZr oxides/NFs                                     | 10                       | 1.63        | Adv. Mater. 2019, 31, 1901439.                 |
| Ir-NR/C                                               | 10                       | 1.57        | Appl. Catal. B-Environ. 2020, 279, 119394.     |
| N-Co <sub>6</sub> Mo <sub>6</sub> C NRs               | 10                       | 1.58        | J. Electroanal. Chem. 2020, 871, 114271.       |
| IrW/C                                                 | 10                       | 1.55        | ACS Central Sci. 2018, 4, 124-1252.            |
| EG/Co <sub>0.85</sub> Se/NiFe-LDH                     | 10                       | 1.67        | Energy Environ. Sci. 2016, 9, 478-483.         |
| NiCo <sub>2</sub> O <sub>4</sub> microcuboids         | 10                       | 1.65        | Angew. Chem.-Int. Edit. 2016, 55, 6290-6294.   |
| IrCu NWs                                              | 10                       | 1.59        | Chem. Eng. J. 2021, 416, 129128.               |
| Co-Mo <sub>2</sub> C                                  | 10                       | 1.68        | Appl. Catal. B-Environ. 2021, 284, 119738.     |
|                                                       | 100                      | 1.95*       |                                                |
| Ir <sub>16</sub> -PdCu/C                              | 10                       | 1.63        | Nano Lett. 2021, 21, 5774-5781.                |
| Co <sub>4</sub> S <sub>3</sub> /Mo <sub>2</sub> C-NSC | 10                       | 1.62        | Appl. Catal. B-Environ. 2020, 260, 118197.     |
| RhCu NTs                                              | 10                       | 1.59        | Adv. Energy Mater. 2020, 10, 1903038.          |
| CoSn <sub>2</sub> /NF                                 | 10                       | 1.55        | Angew. Chem.-Int. Edit. 2018, 57, 15237-15242. |

\* represents that the displayed value is estimated through the given figure from the literature.

## References

- [1] G. Kresse and J. Hafner, *Phys. Rev. B*, 1993, **47**, 558.
- [2] J. P. Perdew, K. Burke and M. Ernzerhof, *Phys. Rev. Lett.*, 1996, **77**, 3865.
- [3] X. Wu, M. C. Vargas, S. Nayak, V. Lotrich and G. Scoles, *J. Chem. Phys.*, 2001, **115**, 8748.
- [4] S. Grimme, *J. Comput. Chem.*, 2006, **27**, 1787.
- [5] P. E. Blöchl, *Phys. Rev. B*, 1994, **50**, 17953.
- [6] S. Haider, A. Roldan and N. H. de Leeuw, *J. Phys. Chem. C*, 2014, **118**, 1958.
- [7] J. K. Norskov, T. Bligaard, A. Logadottir, J. R. Kitchin, J. G. Chen, S. Pandelov and J. K. Norskov, *J. Electrochem. Soc.*, 2005, **152**, J23.
- [8] J. K. Norskov, J. Rossmeisl, A. Logadottir, L. Lindqvist, J. R. Kitchin, T. Bligaard and H. Jonsson, *J. Phys. Chem. B*, 2004, **108**, 17886.
- [9] J. Rossmeisl, A. Logadottir and J. K. Norskov, *Chem. Phys.*, 2005, **319**, 178.
- [10] A. Valdes, Z. W. Qu, G. J. Kroes, J. Rossmeisl and J. K. Norskov, *J. Phys. Chem. C*, 2008, **112**, 9872.
